# Supplementary material for: Efficient synthesis of functionalized spiro[indoline-3,4′-pyridines] and spiro[indene-2,4′-pyridines] via a three-component reaction
Source: Royal Society of Chemistry journal article supplement (doi:10.1039/c5ra15139b), 2015-01-01
Supplement: c5ra15139b1.pdf [file c5ra15139b1.pdf]

**Efficient synthesis of functionalized spiro[indoline-3,4'-pyridines] and  
spiro[indene-2,4'-pyridines] via three-component reaction**

**Jing Zhang, Jing Sun, Chao-Guo Yan\***

**Supporting Information**

**<sup>1</sup>H, <sup>13</sup>C NMR and HRMS spectra of the new compounds:**

**2-28**

**Dimethyl 1-benzyl-3',3'-dicyano-1'-(4-methoxyphenyl)-2-oxo-2'-styryl-2',3'-dihydro-1'H-spiro[indoline-3,4'-pyridine]-5',6'-dicarboxylate (3a):**

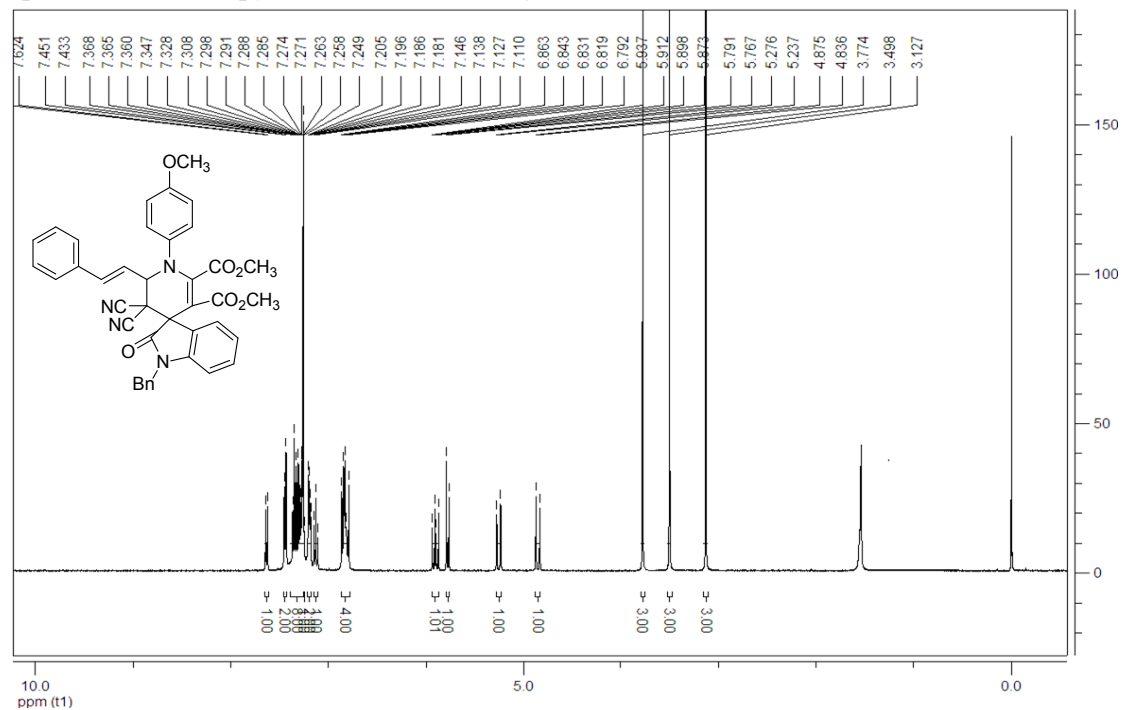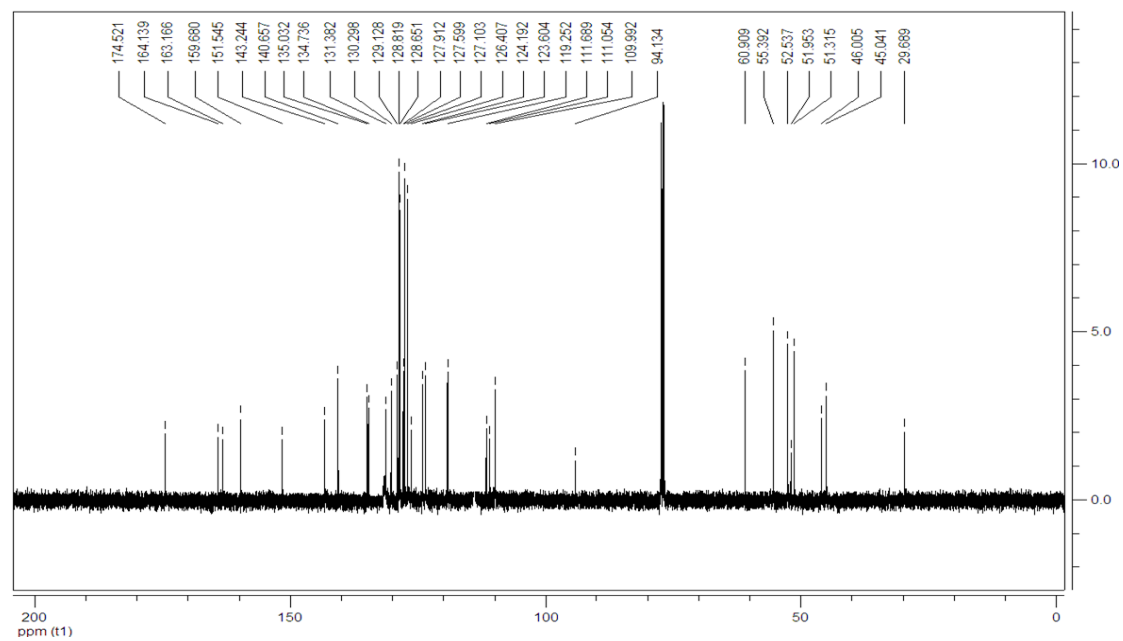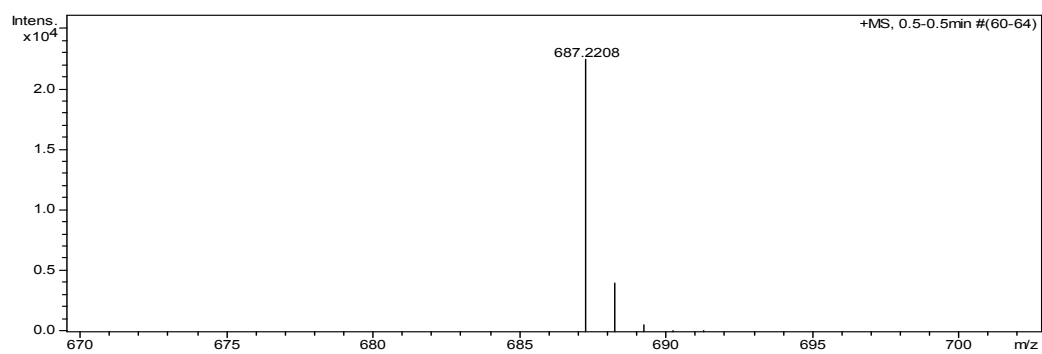

**Dimethyl 3',3'-dicyano-1'-(4-methoxyphenyl)-2-oxo-1-propyl-2'-styryl-2',3'-dihydro-1'H-spiro[indoline-3,4'-pyridine]-5',6'-dicarboxylate (3b):**

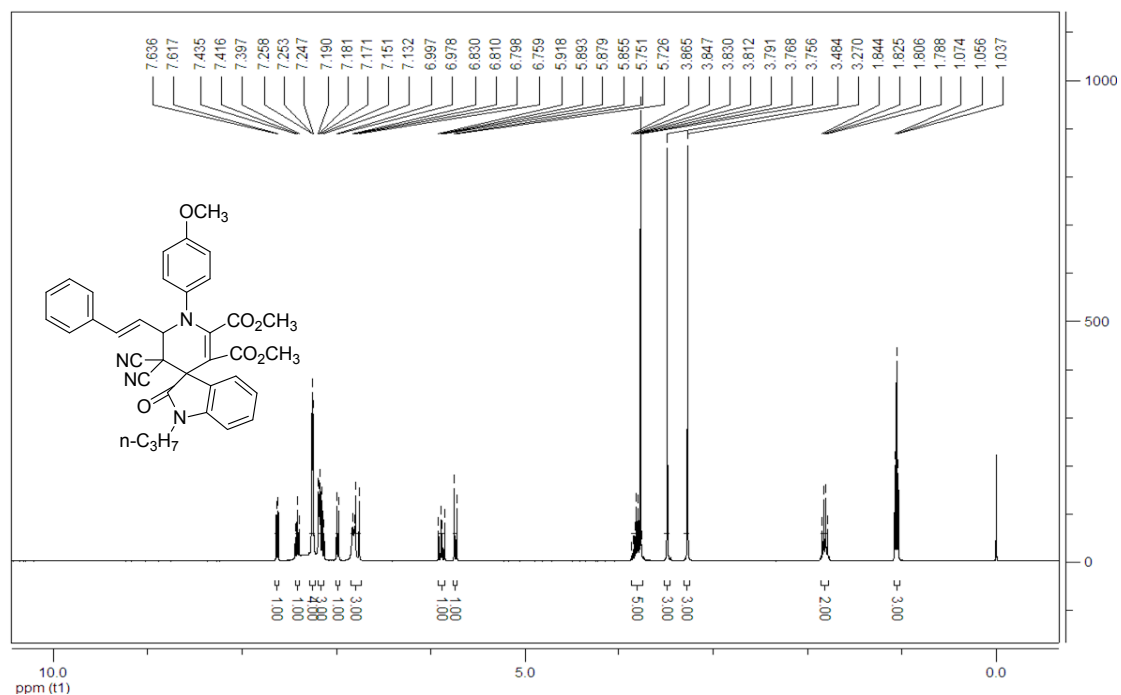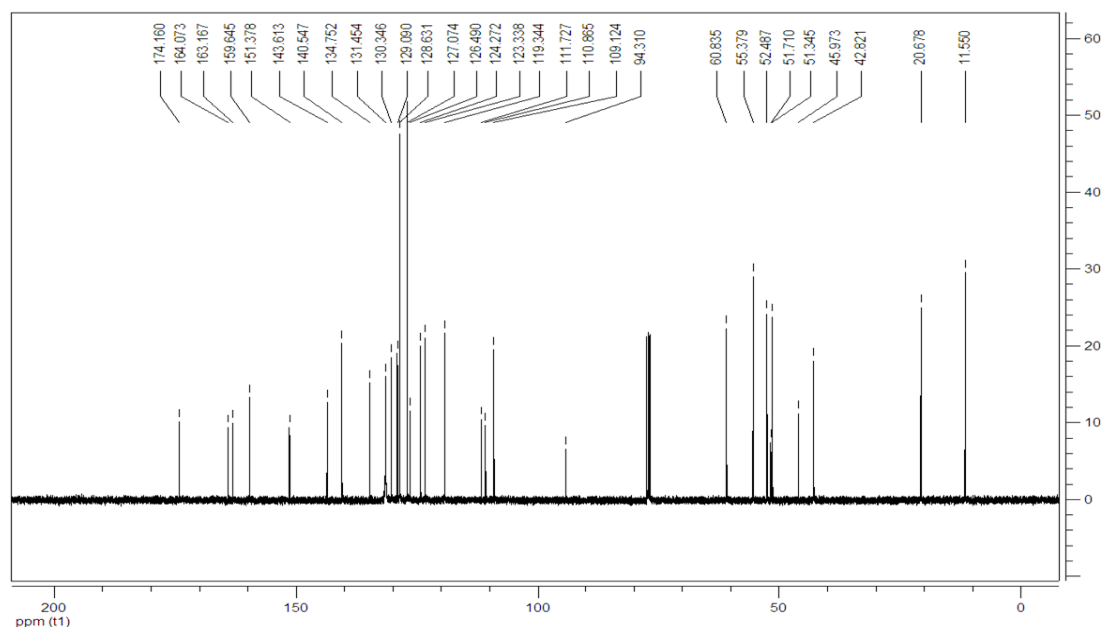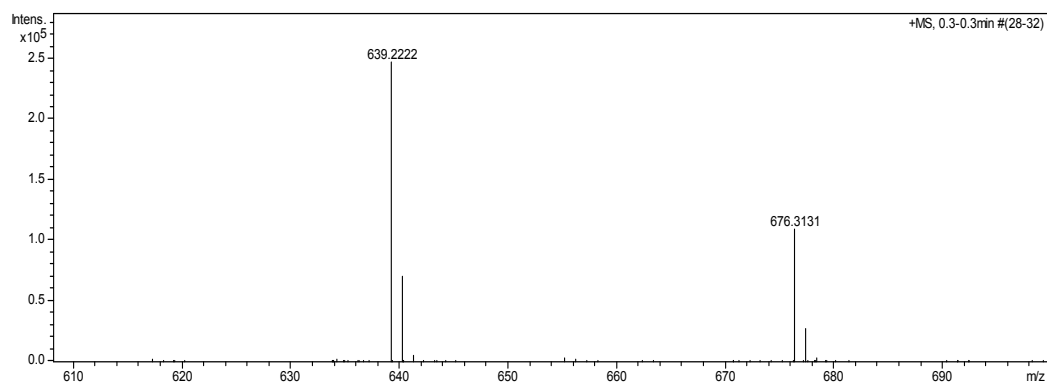

**Dimethyl 1-butyl-3,3'-dicyano-5-fluoro-1'-(4-methoxyphenyl)-2-oxo-2'-styryl-2',3'-dihydro-1'H-spiro[indoline-3,4'-pyridine]-5',6'-dicarboxylate (3c):**

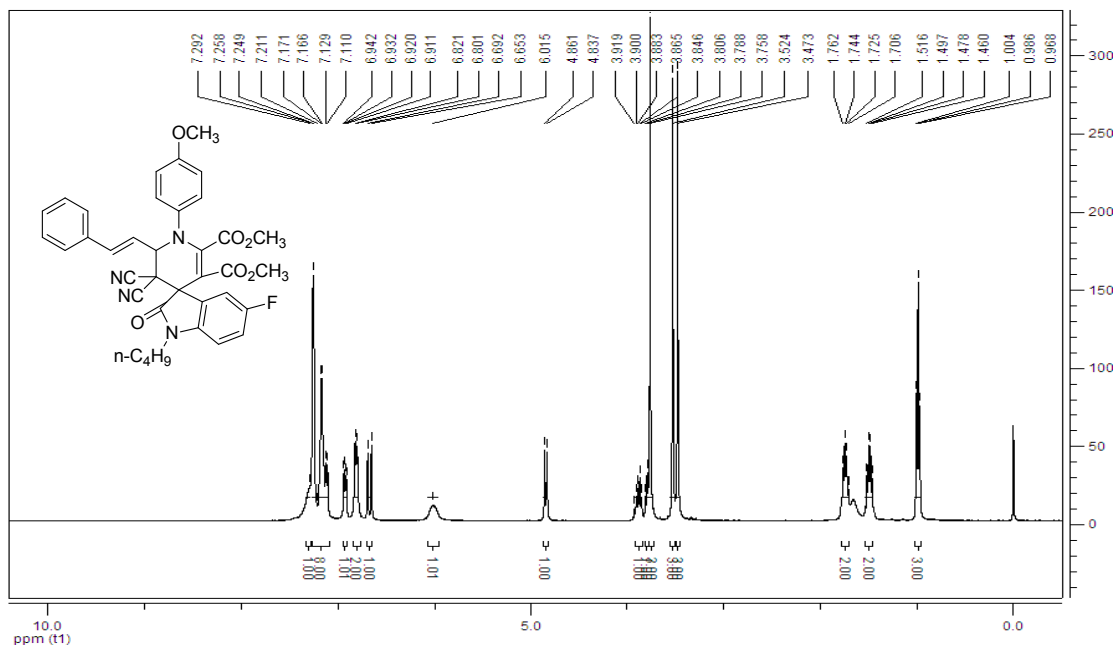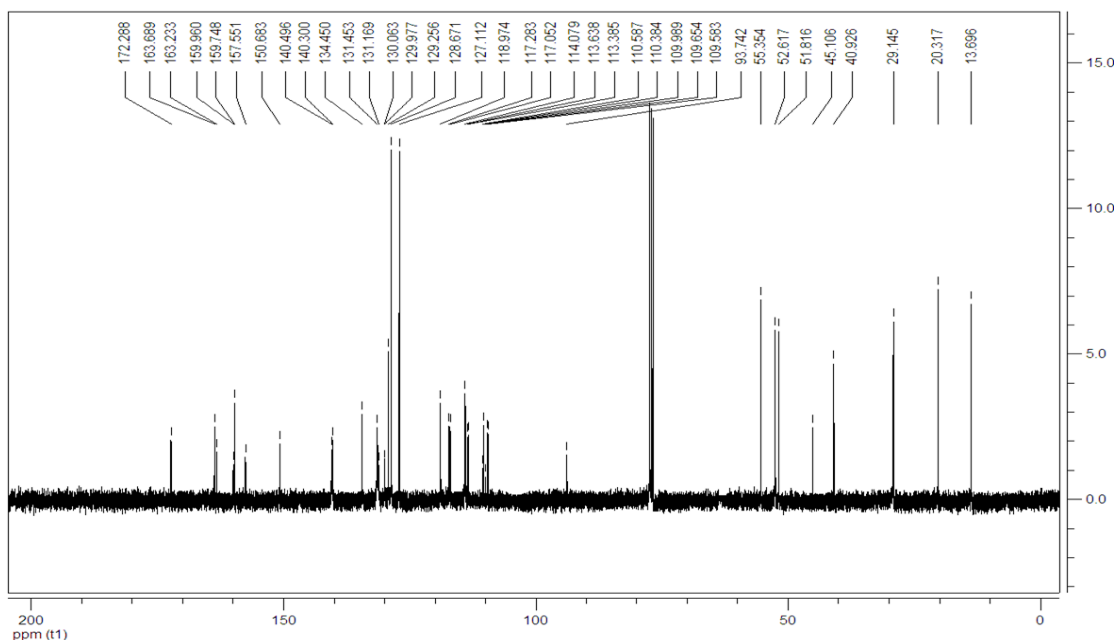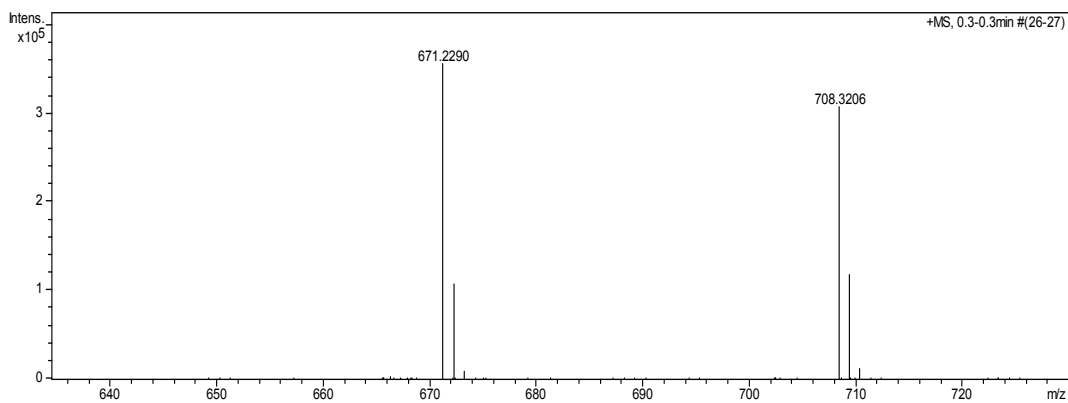

**Dimethyl 5-chloro-3',3'-dicyano-1'-(4-methoxyphenyl)-2-oxo-1-propyl-2'-styryl-2',3'-dihydro-1'H-spiro[indoline-3,4'-pyridine]-5',6'-dicarboxylate (3d):**

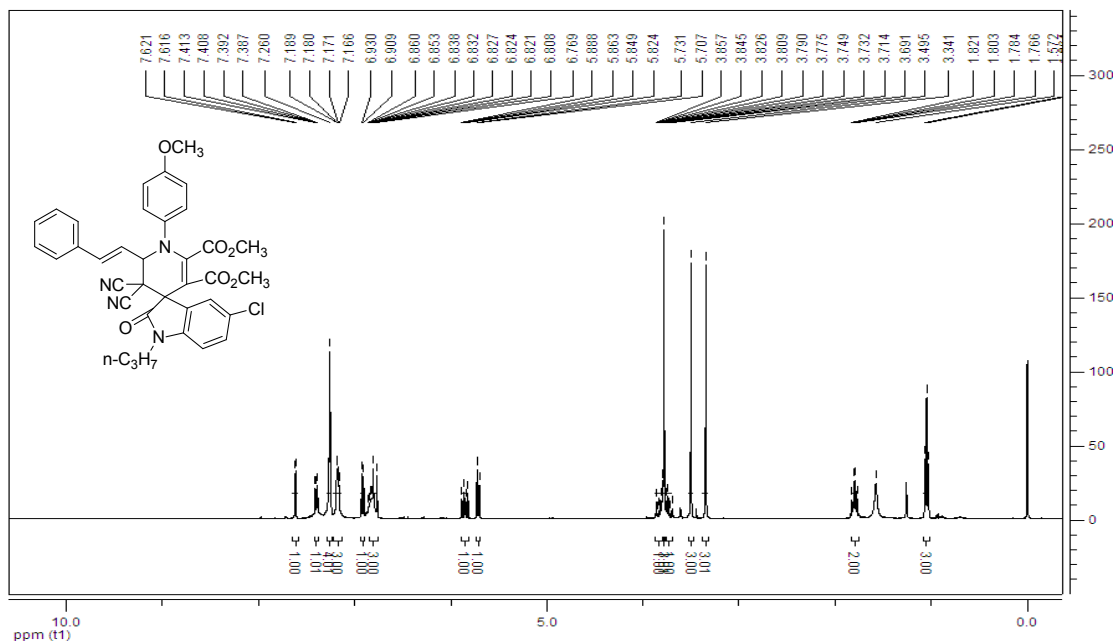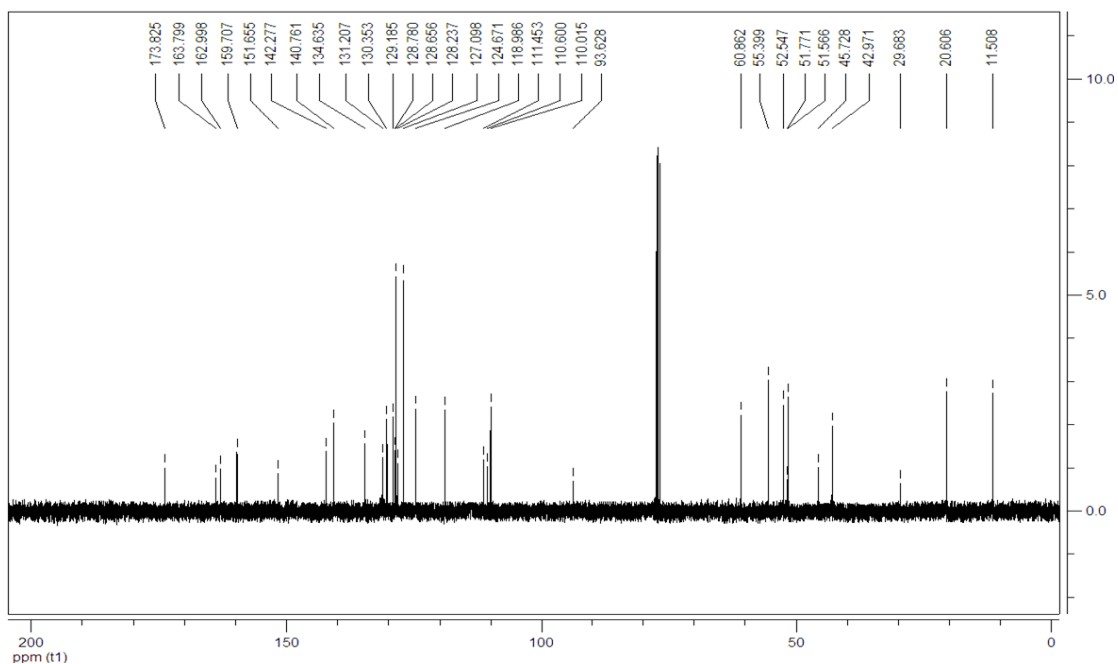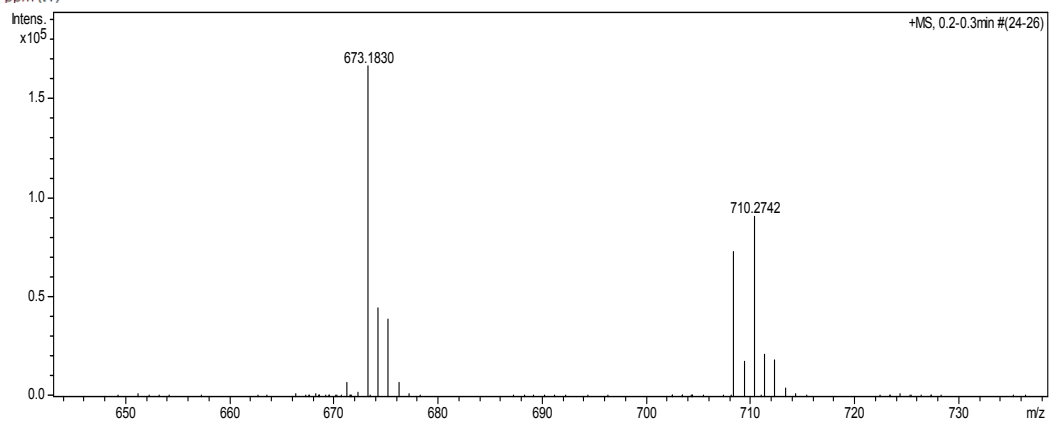

**Dimethyl 2'-(3-chlorostyryl)-3,3'-dicyano-2-oxo-1'-phenyl-1-propyl-2',3'-dihydro-1'H-spiro[indoline-3,4'-pyridine]-5',6'-dicarboxylate (3e):**

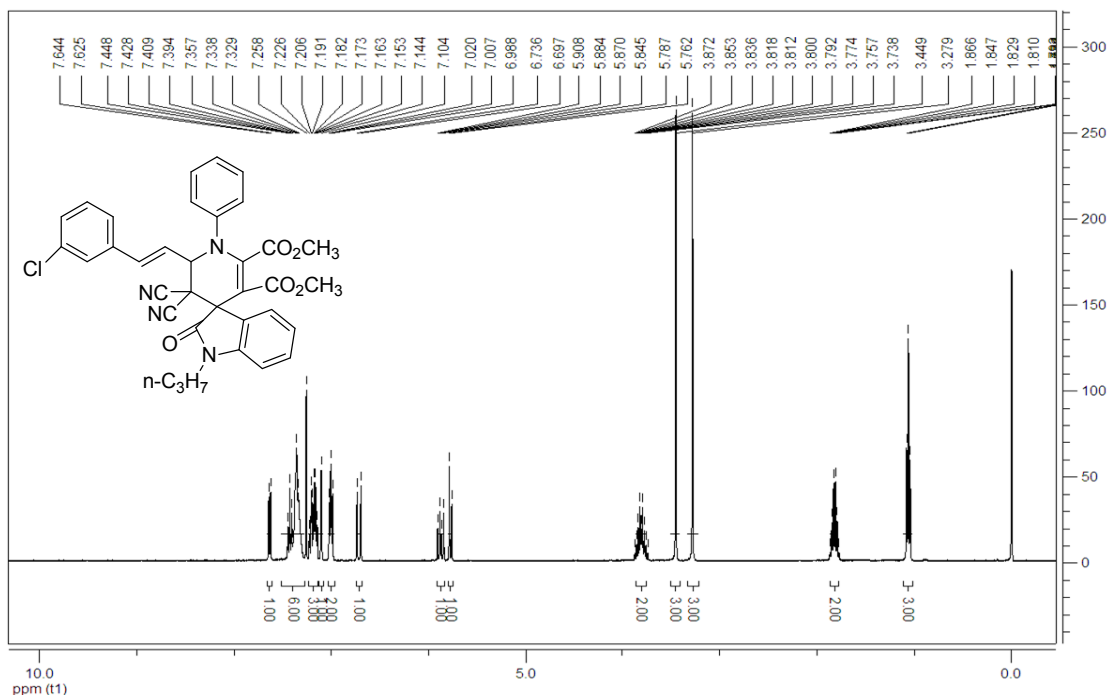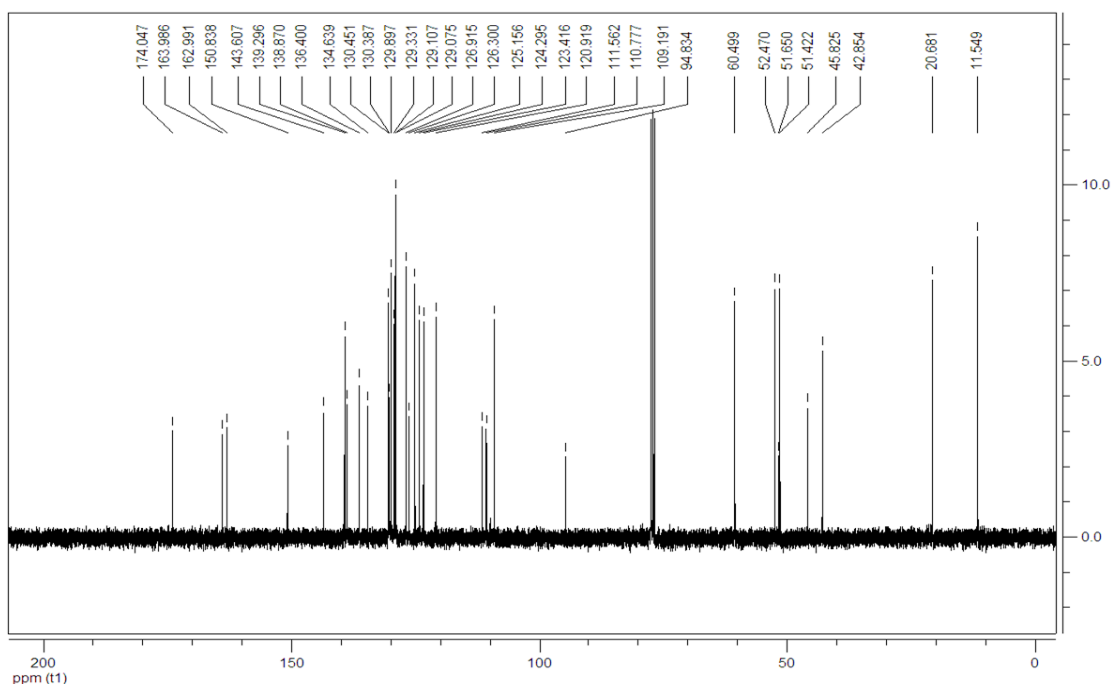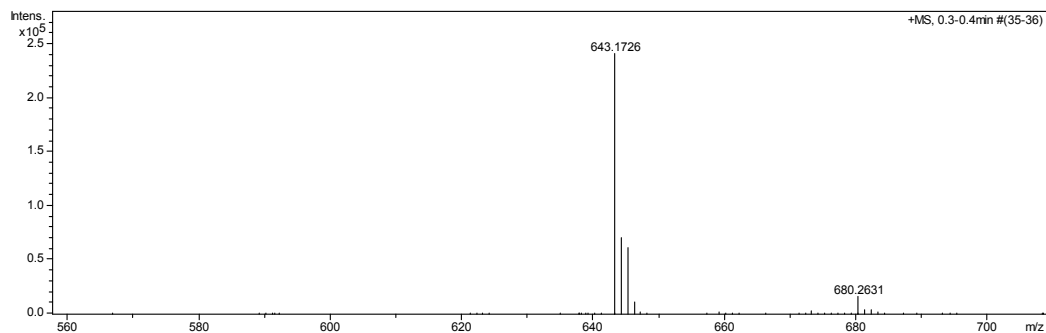

**Dimethyl 1-benzyl-2'-(3-chlorostyryl)-3',3'-dicyano-5-fluoro-2-oxo-1'-phenyl-2',3'-dihydro-1'H-spiro[indoline-3,4'-pyridine]-5',6'-dicarboxylate (3f):**

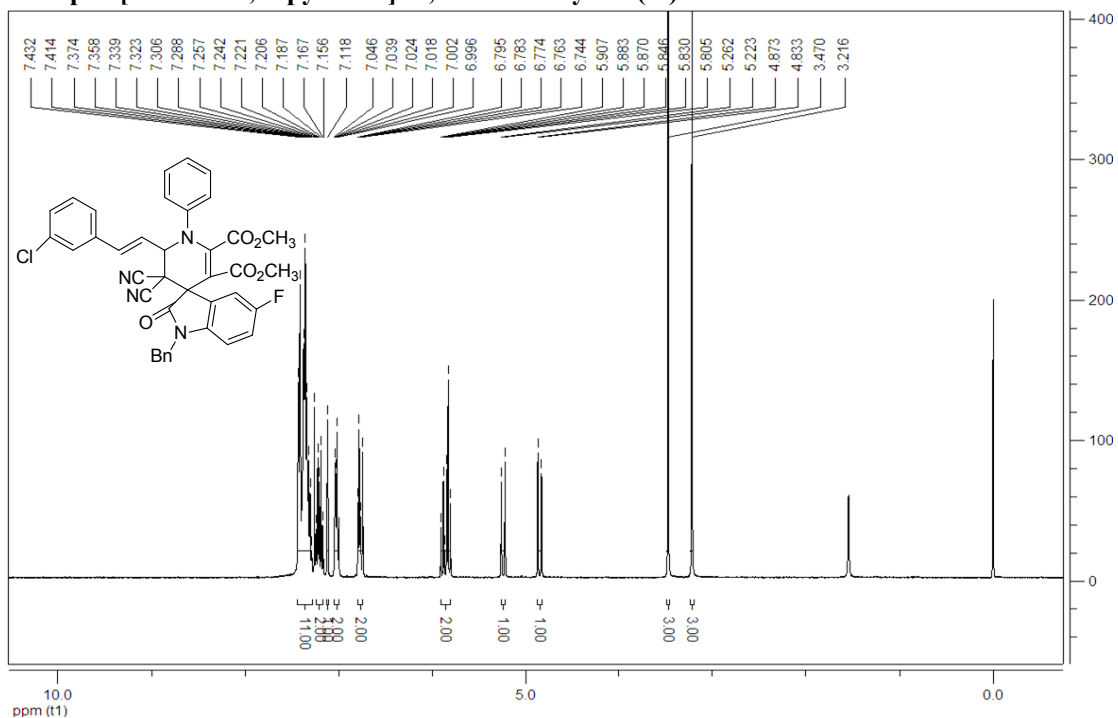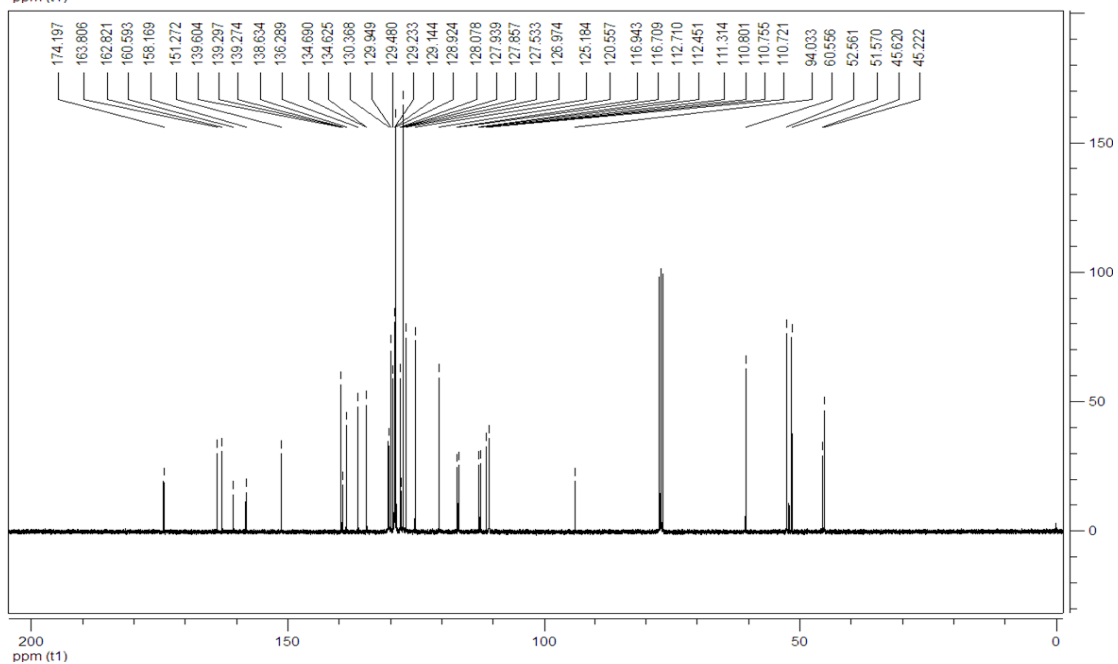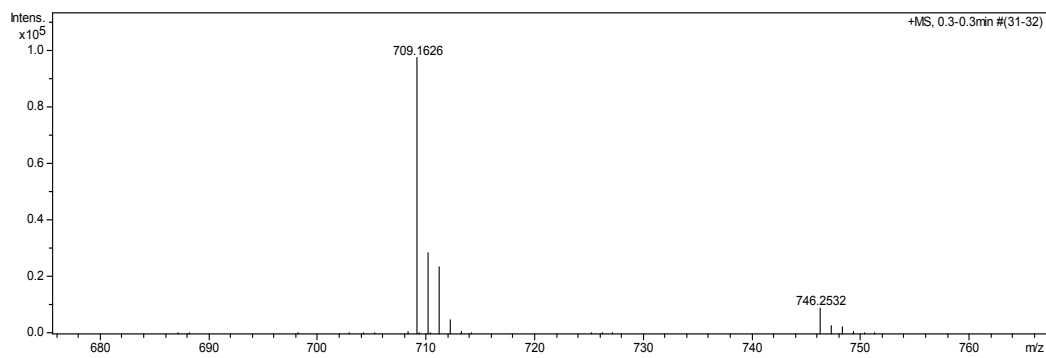

**Dimethyl 5-chloro-2'-(3-chlorostyryl)-3,3'-dicyano-2-oxo-1'-phenyl-1-propyl-2',3'-dihydro-1'H-spiro[indoline-3,4'-pyridine]-5',6'-dicarboxylate (3g):**

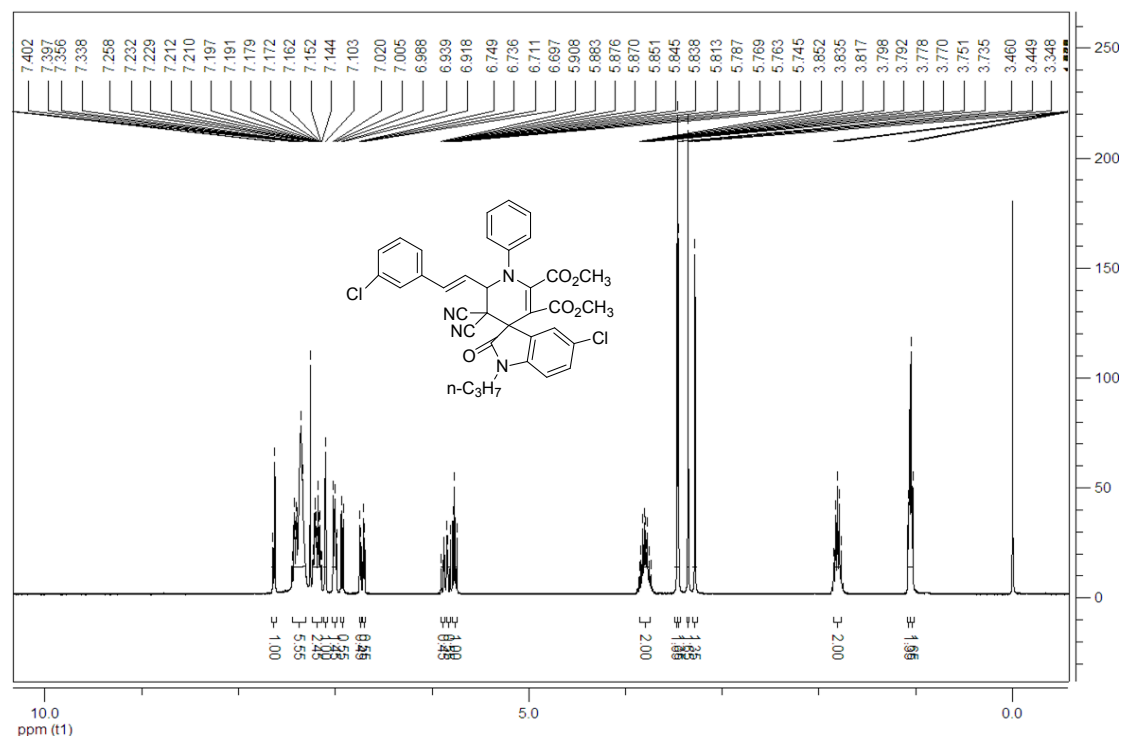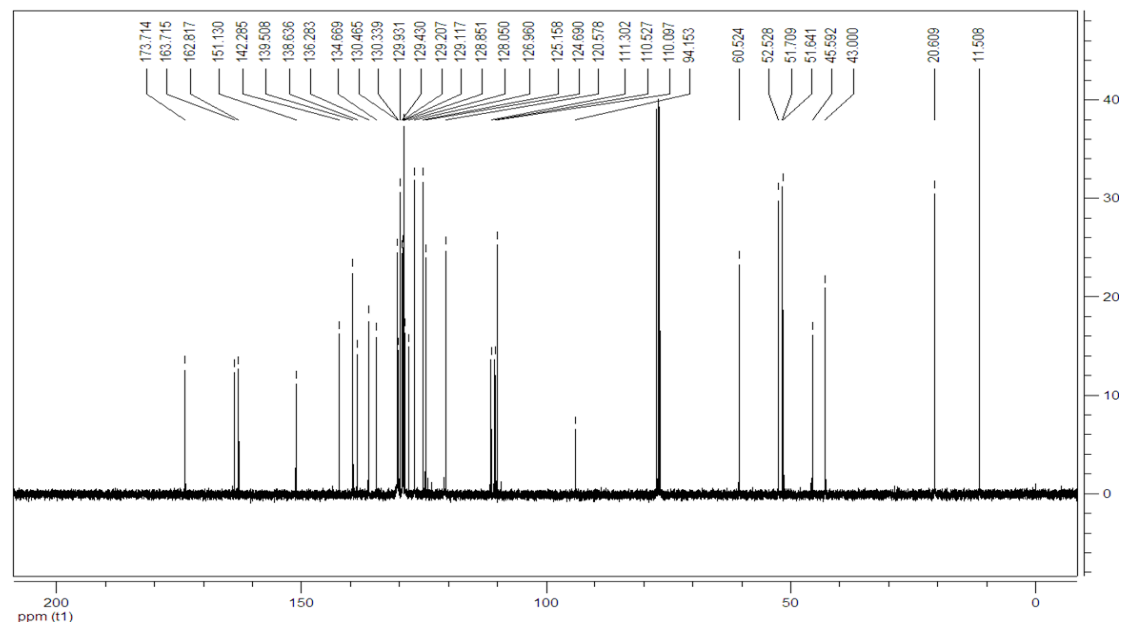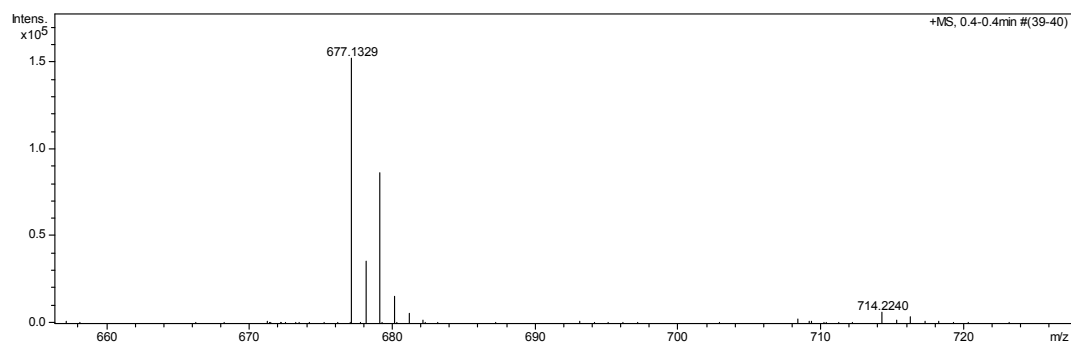



**Dimethyl 1'-(4-bromophenyl)-2'-(3-chlorostyryl)-3',3'-dicyano-2-oxo-1-propyl-2',3'-dihydro-1'H-spiro[indoline-3,4'-pyridine]-5',6'-dicarboxylate (3h):**

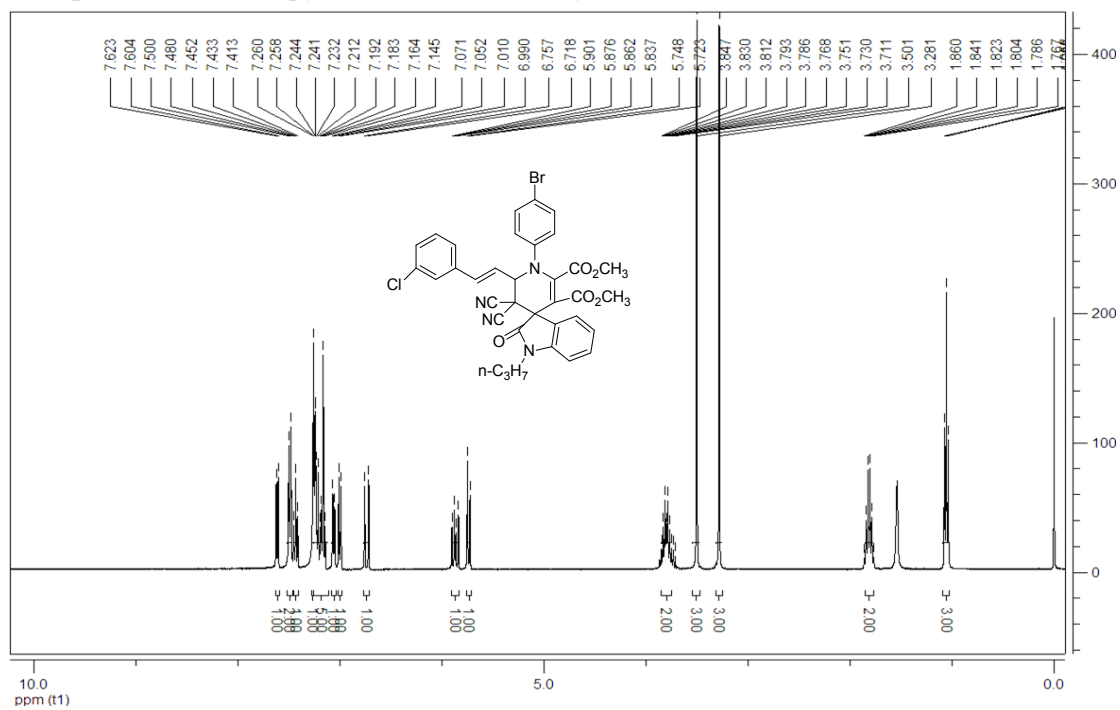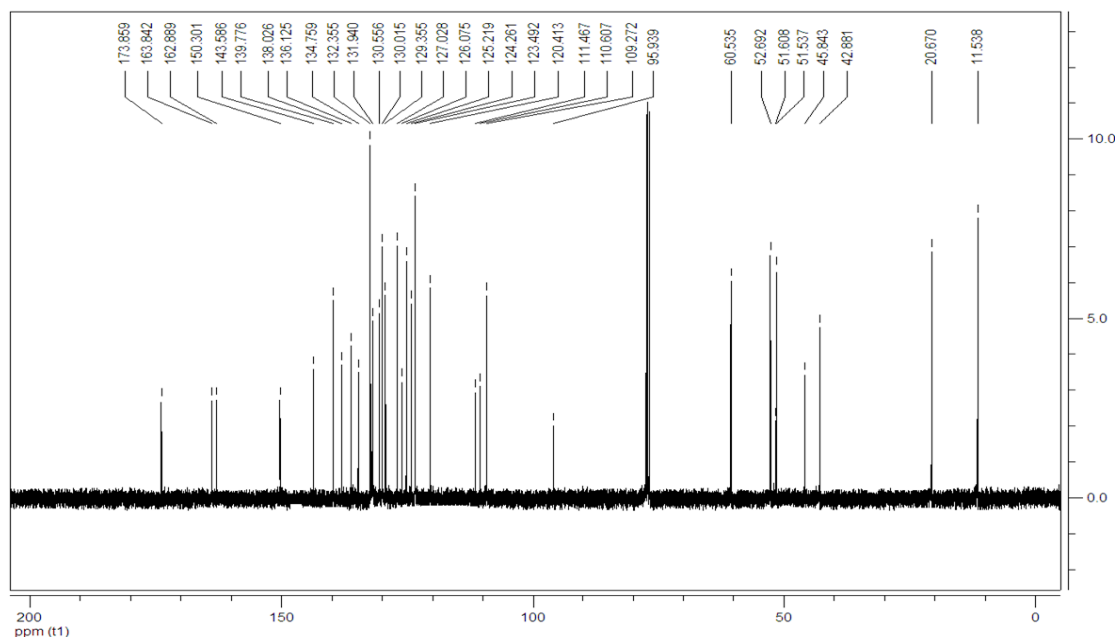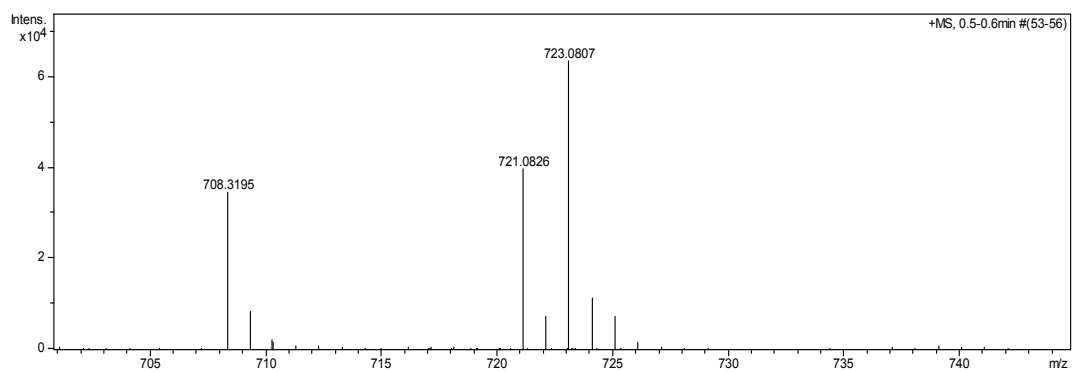

**Dimethyl 1-benzyl-1'-(4-bromophenyl)-2'-(3-chlorostyryl)-3',3'-dicyano-2-oxo-2',3'-dihydro-1'H-spiro[indoline-3,4'-pyridine]-5',6'-dicarboxylate (3i):**

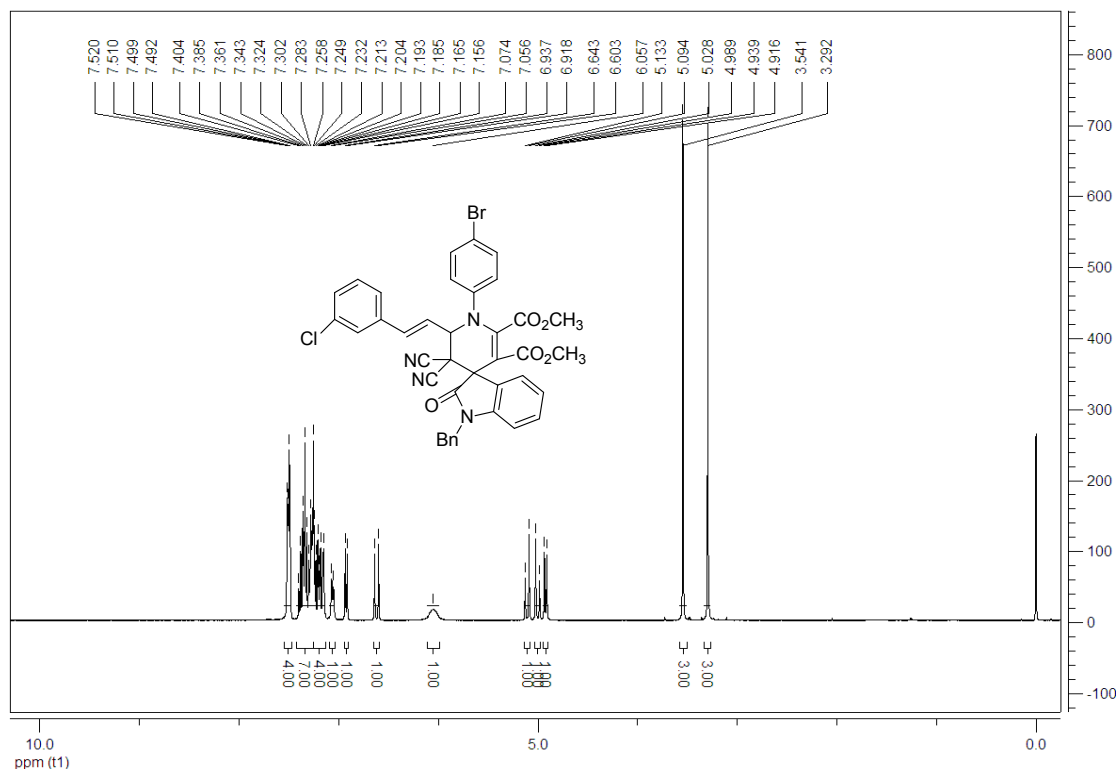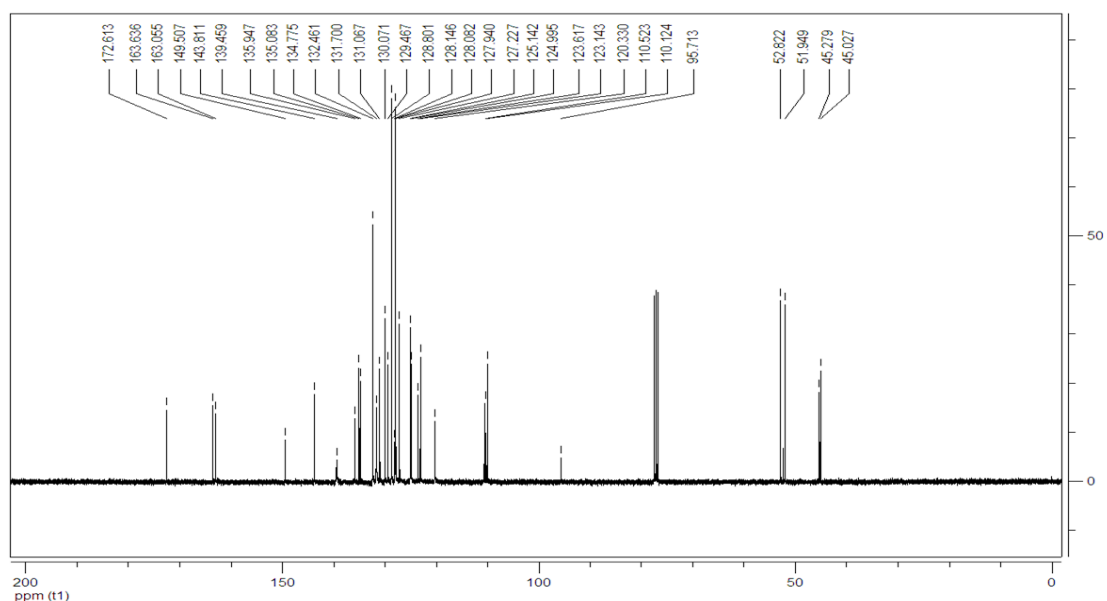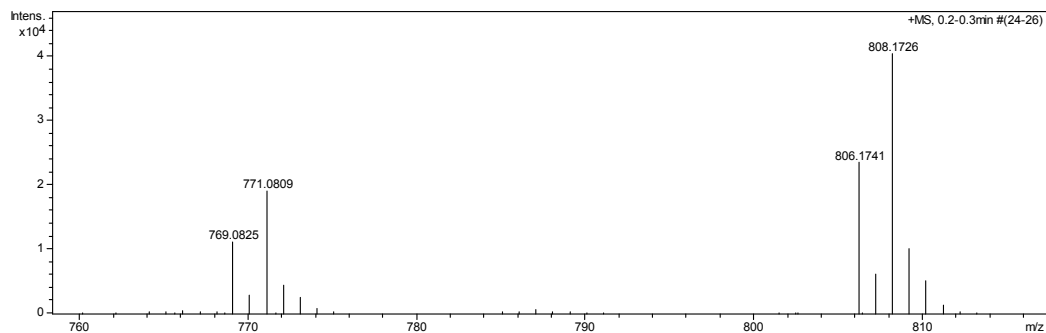

**Dimethyl 1-benzyl-1'-(4-bromophenyl)-2'-(3-chlorostyryl)-3',3'-dicyano-5-fluoro-2-oxo- 2',3'-dihydro-1'H-spiro[indoline-3,4'-pyridine]-5',6'-dicarboxylate (3j):**

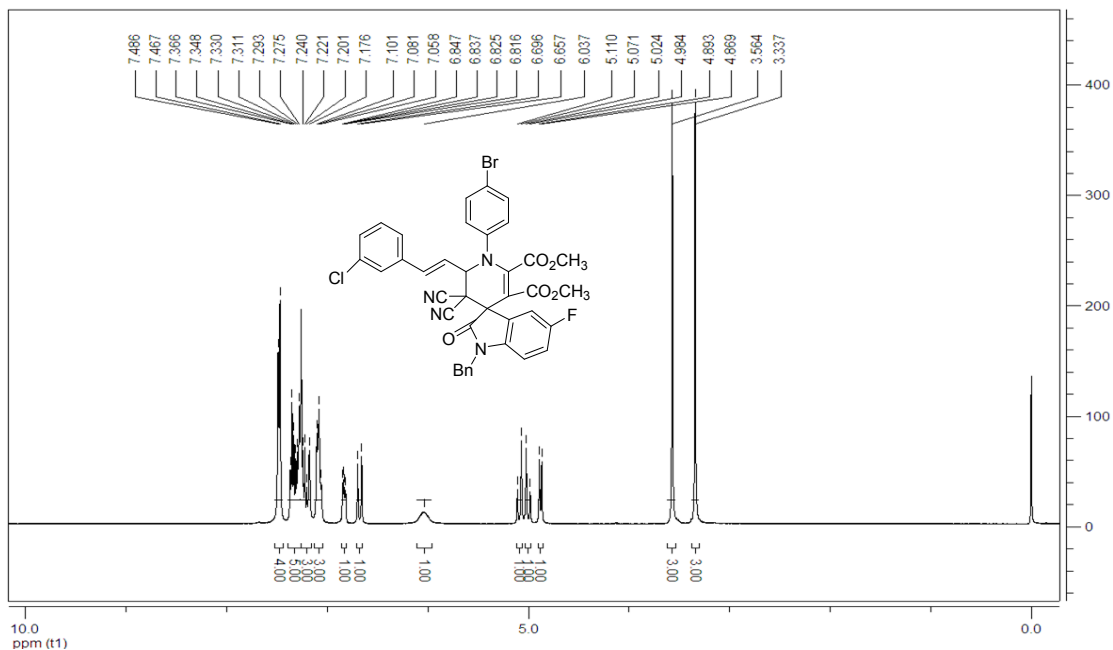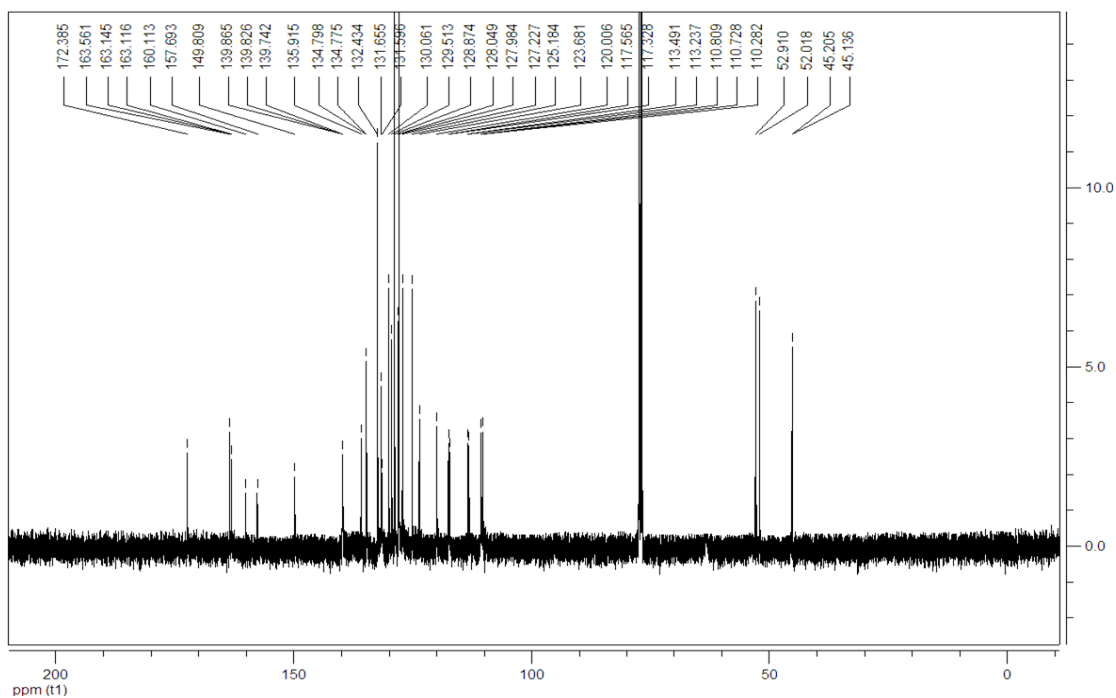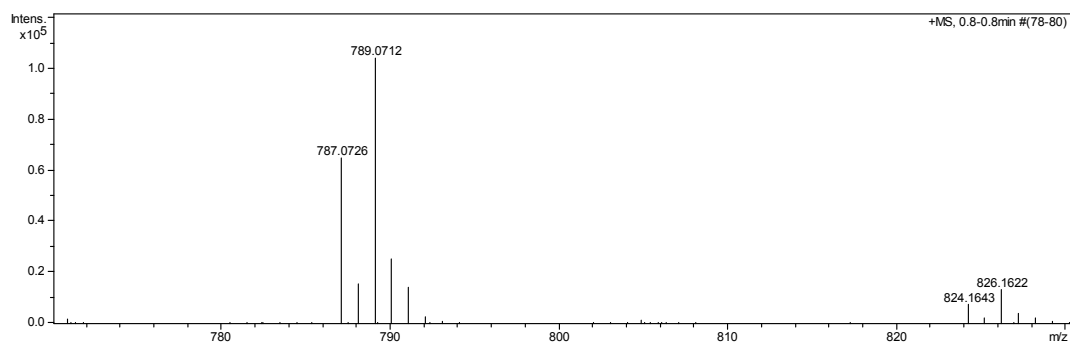

**Dimethyl 1'-(4-bromophenyl)-1-butyl-2'-(3-chlorostyryl)-3',3'-dicyano-5-fluoro-2-oxo-2',3'-dihydro-1'H-spiro[indoline-3,4'-pyridine]-5',6'-dicarboxylate (3k):**

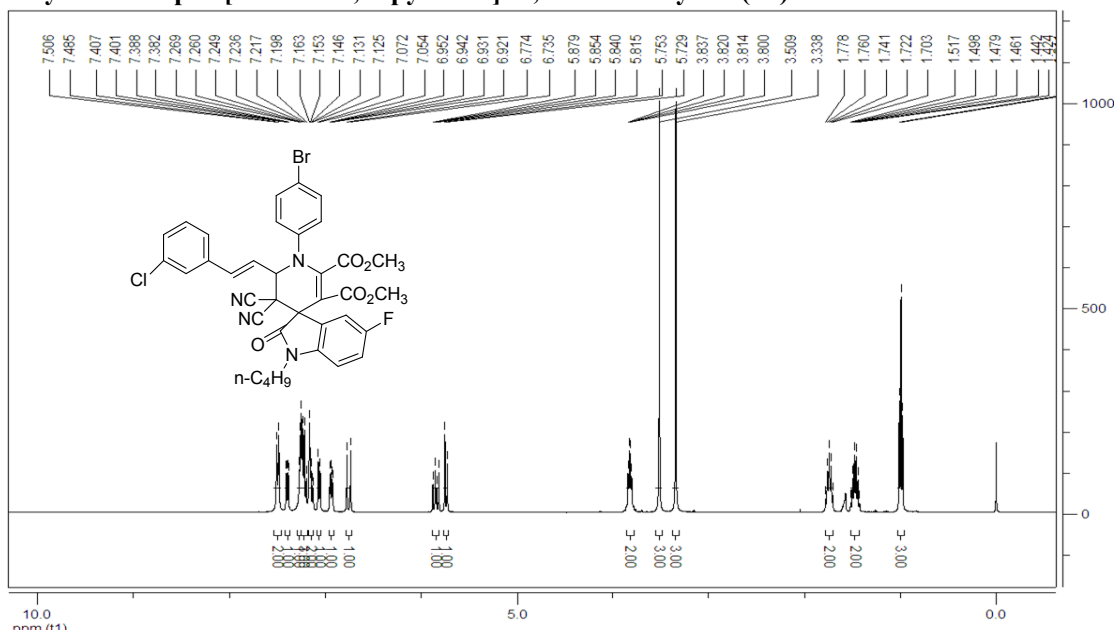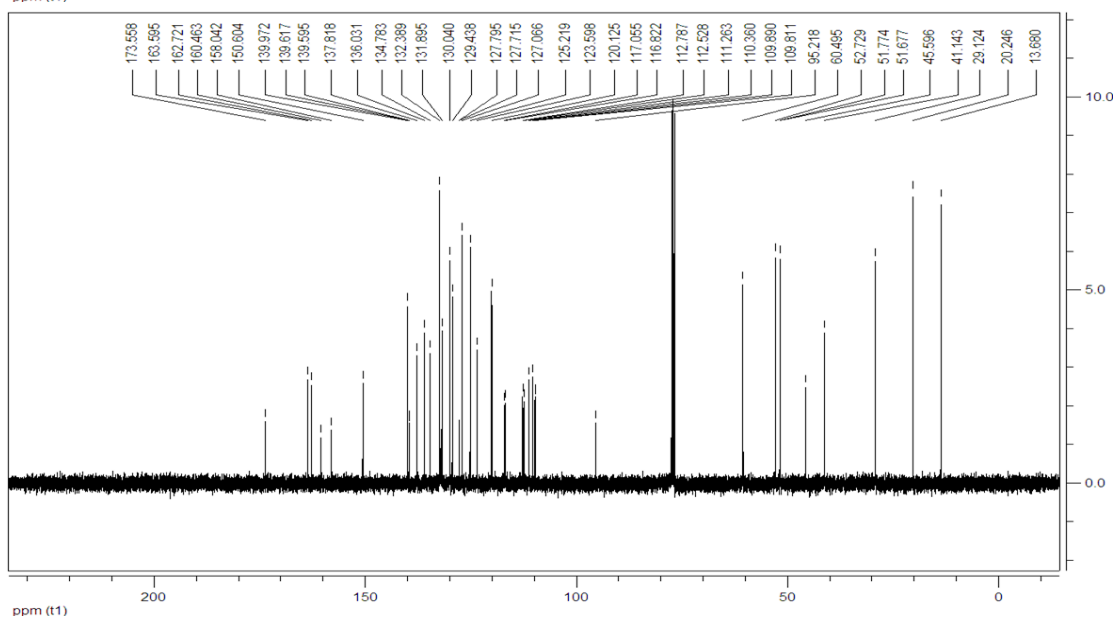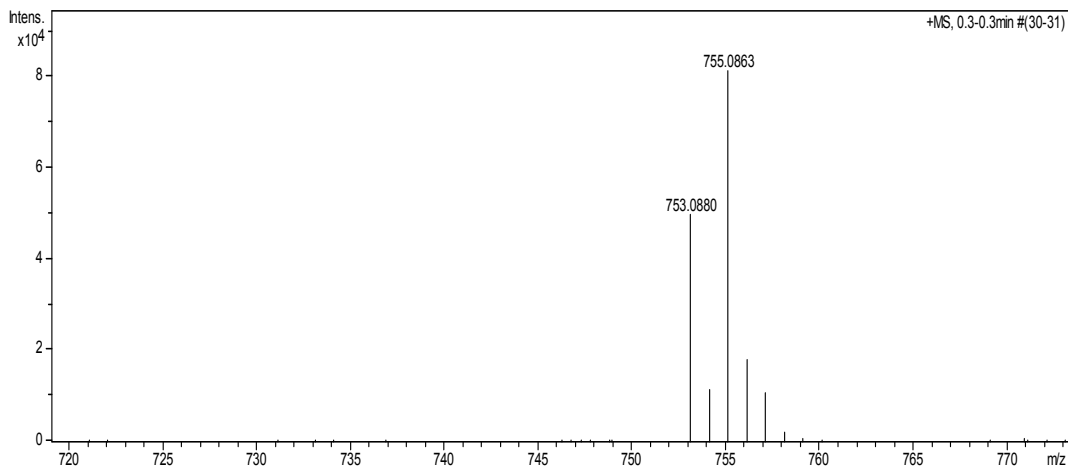

**Dimethyl 1'-(4-bromophenyl)-5-chloro-2'-(3-chlorostyryl)-3',3'-dicyano-2-oxo-1-propyl-2',3'-dihydro-1'H-spiro[indoline-3,4'-pyridine]-5',6'-dicarboxylate (3l):**

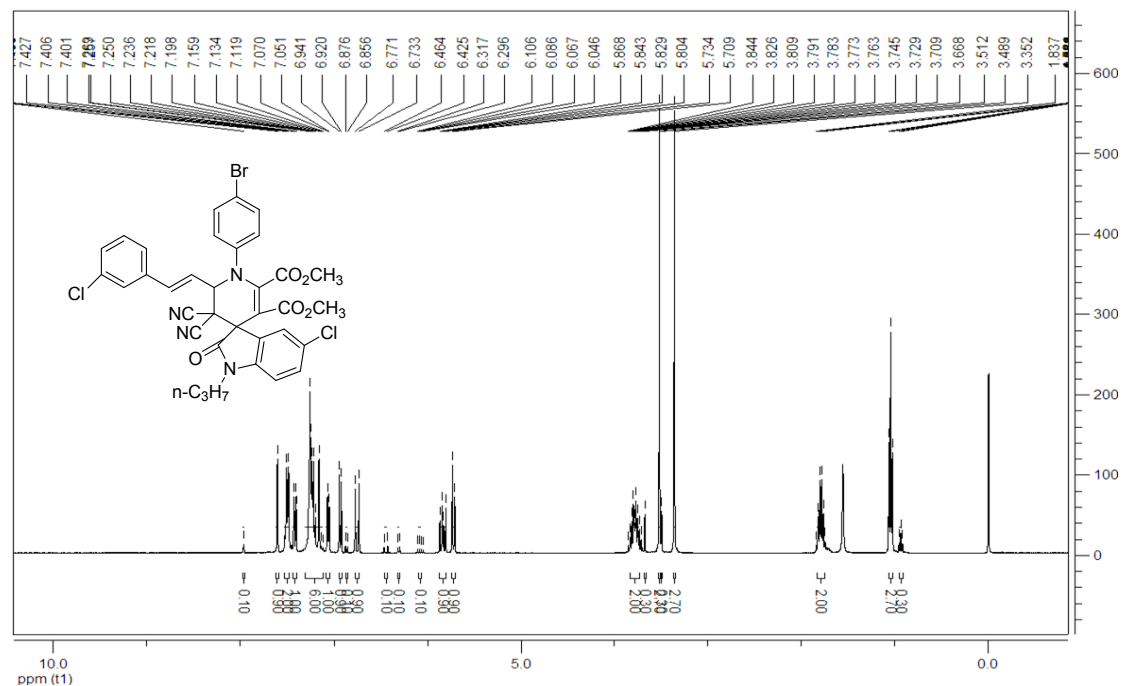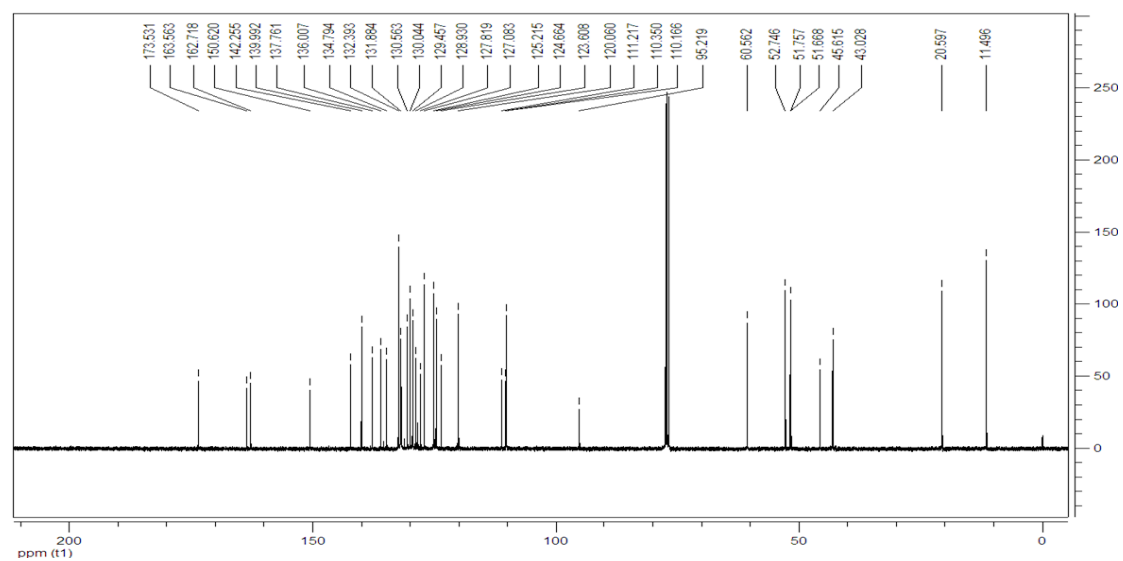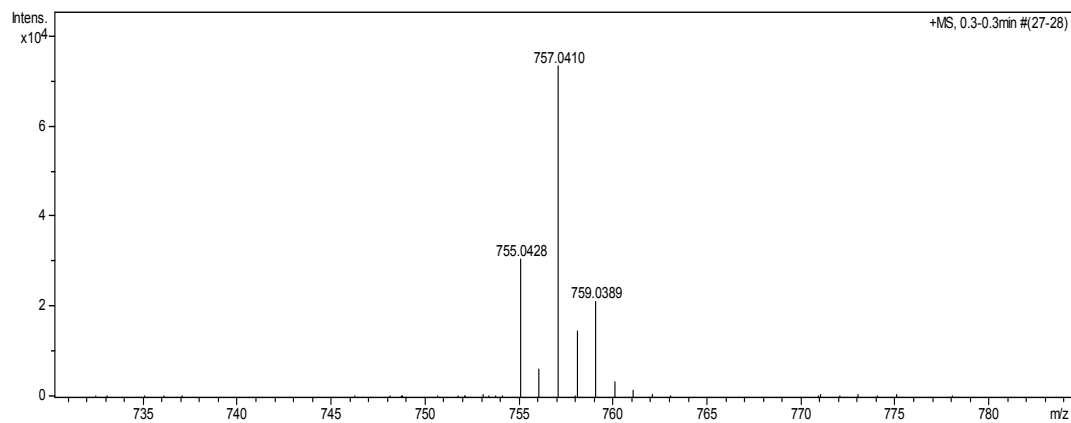

**Dimethyl 1-benzyl-3',3'-dicyano-1'-(4-methoxyphenyl)-2'-(4-nitrostyryl)-2-oxo-2',3'-dihydro-**

**<sup>1</sup>H-spiro[indoline-3,4'-pyridine]-5',6'-dicarboxylate (3m):**

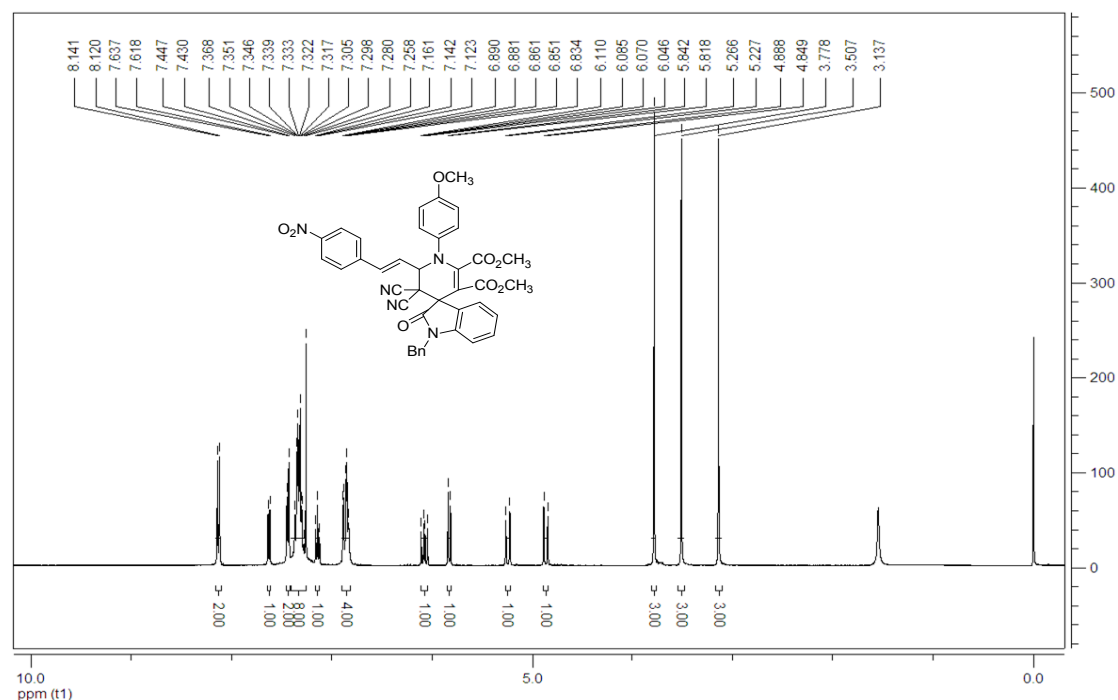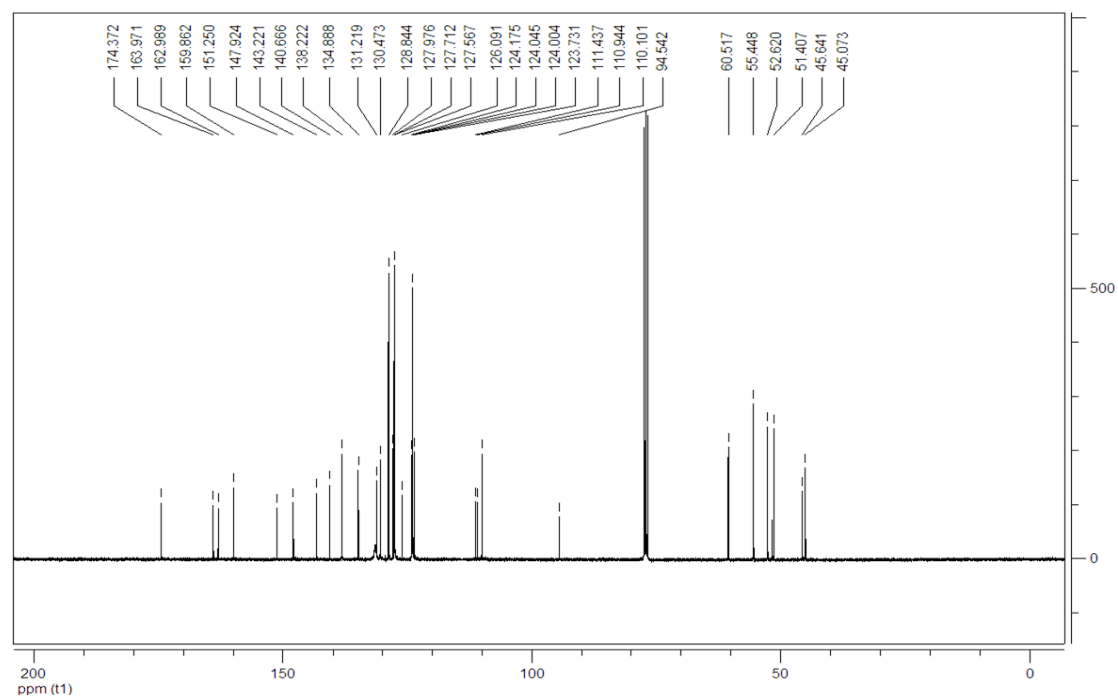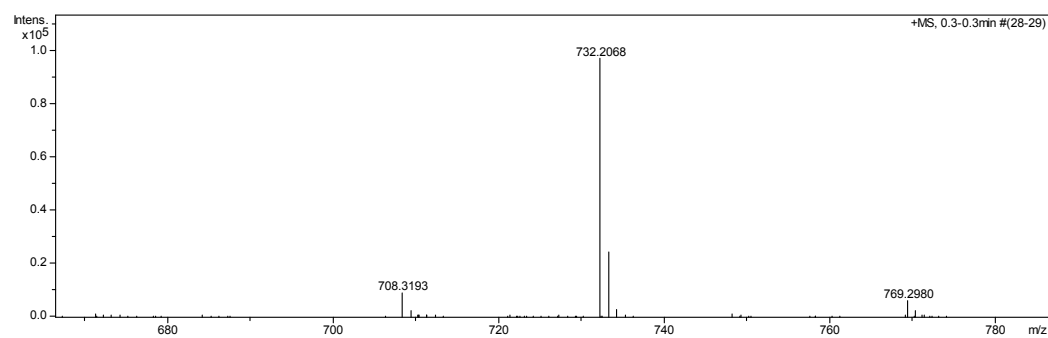

**Methyl 1-benzyl-1'-(4-chlorophenyl)-3',3'-dicyano-2-oxo-2'-styryl-2',3'-dihydro-1'H-**

**spiro[indoline-3,4'-pyridine]-5'-carboxylate (4a):**

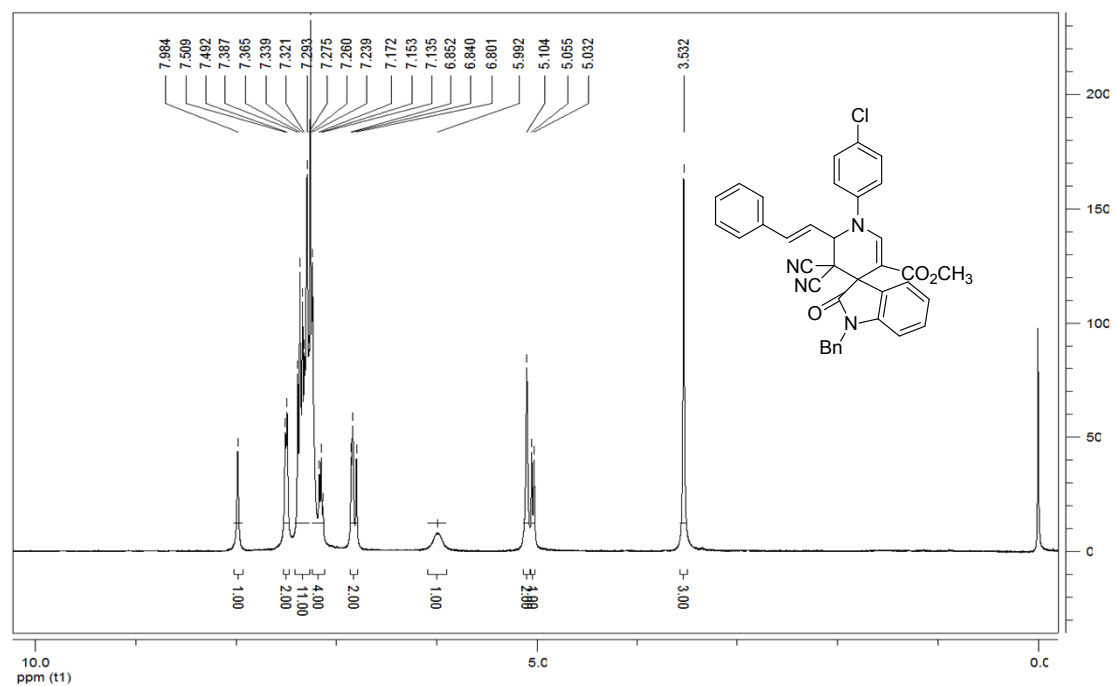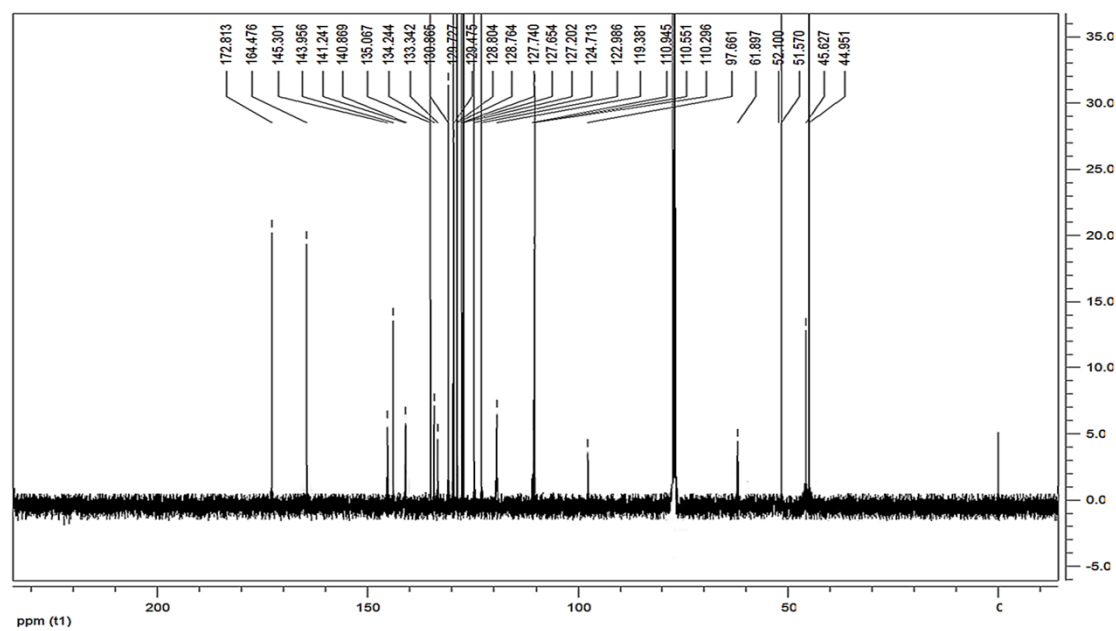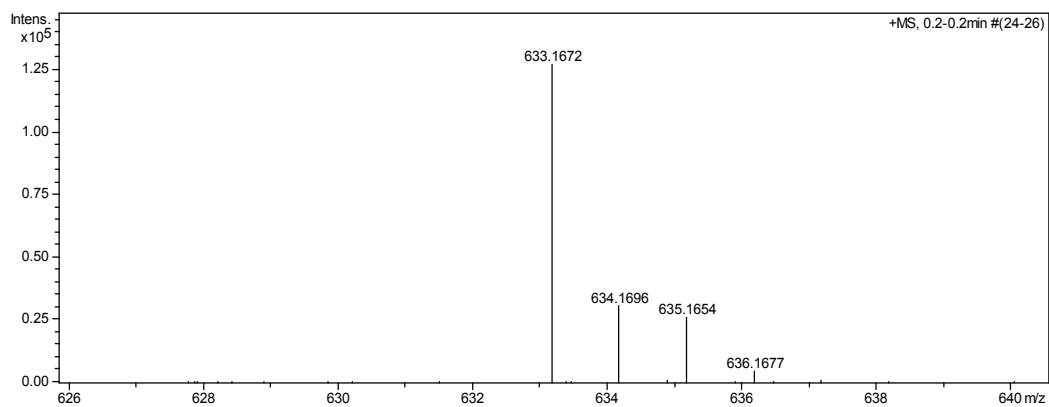

**Methyl 1-benzyl-1'-(4-bromophenyl)-3',3'-dicyano-2-oxo-2'-styryl-2',3'-dihydro-1'H-spiro**

[indoline-3,4'-pyridine]-5'-carboxylate (4b):

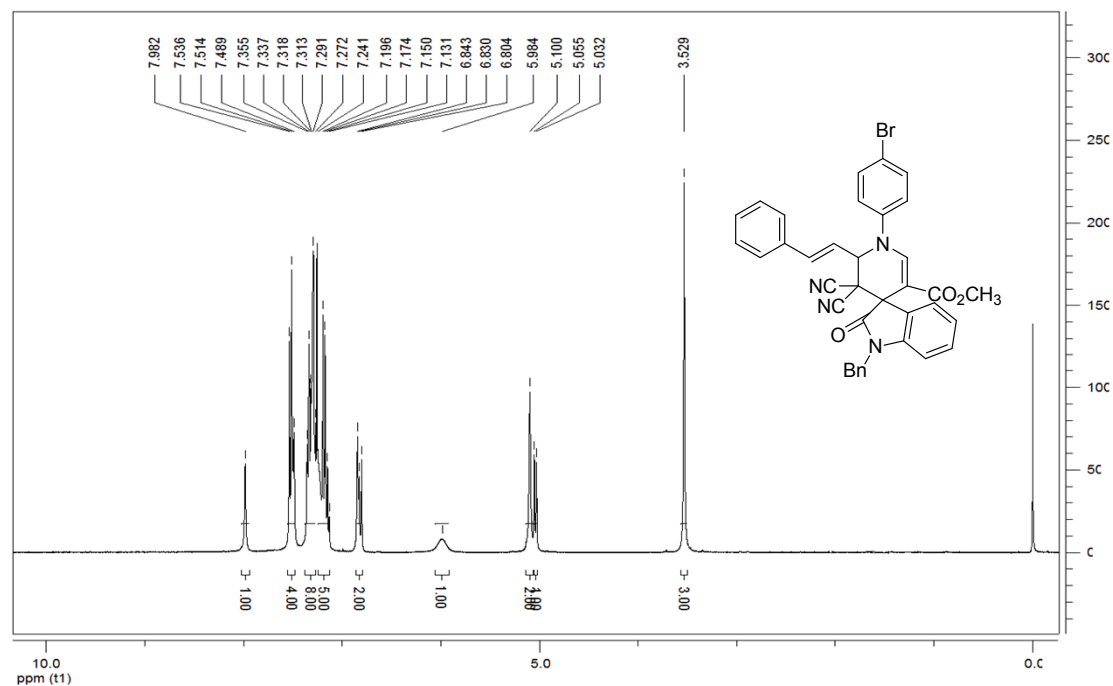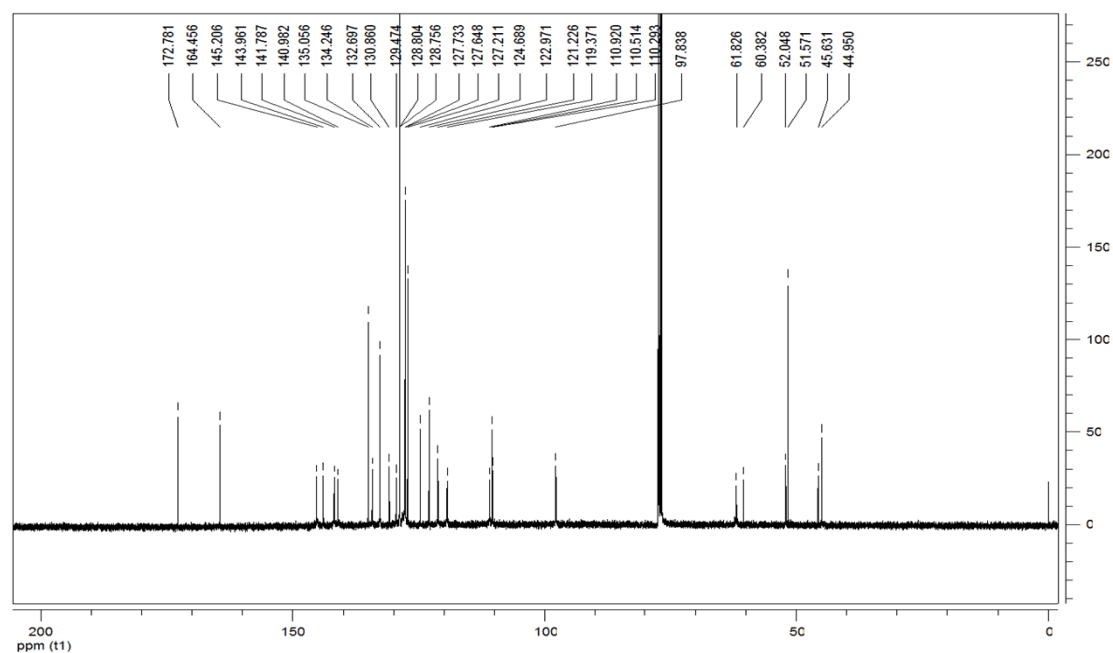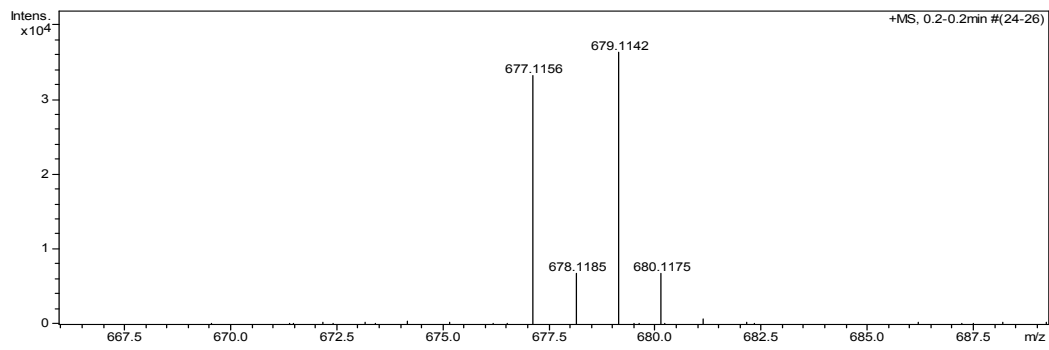

**Methyl 1-benzyl-3',3'-dicyano-1'-(4-methoxyphenyl)-5-methyl-2-oxo-2'-styryl-2',3'-dihydro-**



**<sup>1</sup>H-spiro[indoline-3,4'-pyridine]-5'-carboxylate (4c):**

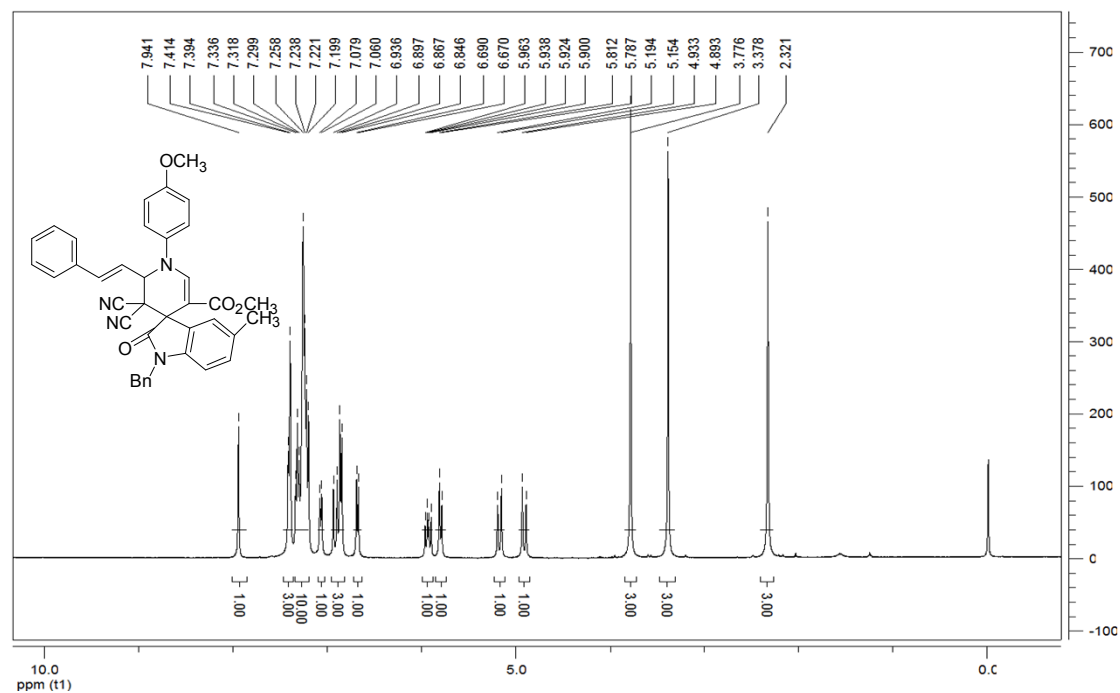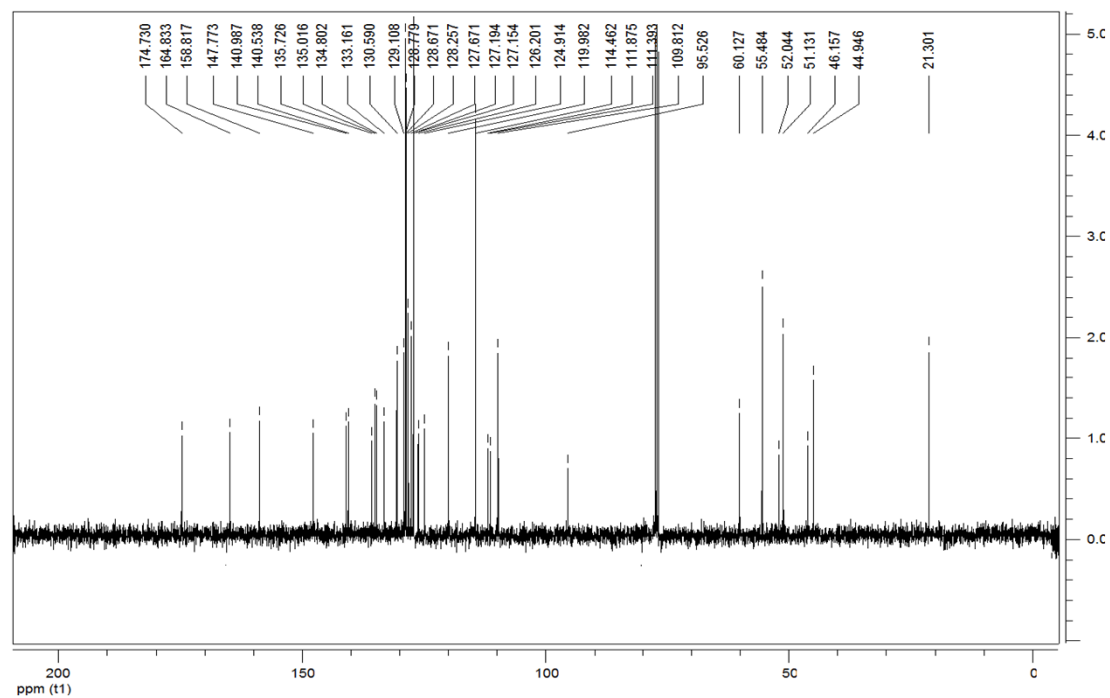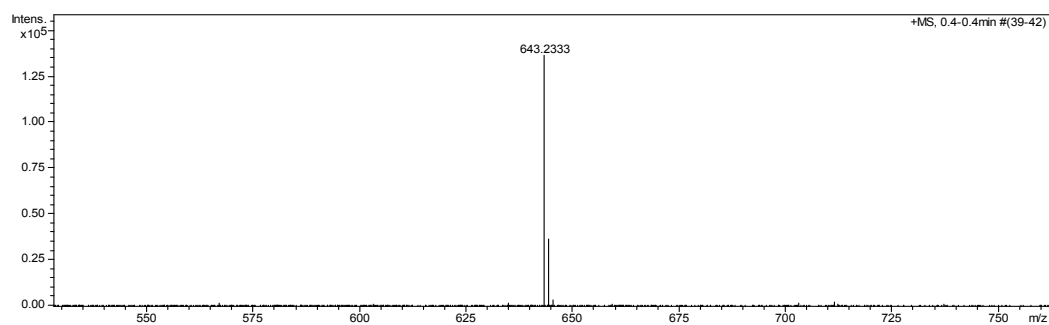

**Methyl 1-butyl-3',3'-dicyano-1'-(4-methoxyphenyl)-5-methyl-2-oxo-2'-styryl-2',3'-dihydro-**

**<sup>1</sup>H-spiro[indoline-3,4'-pyridine]-5'-carboxylate (4d):**

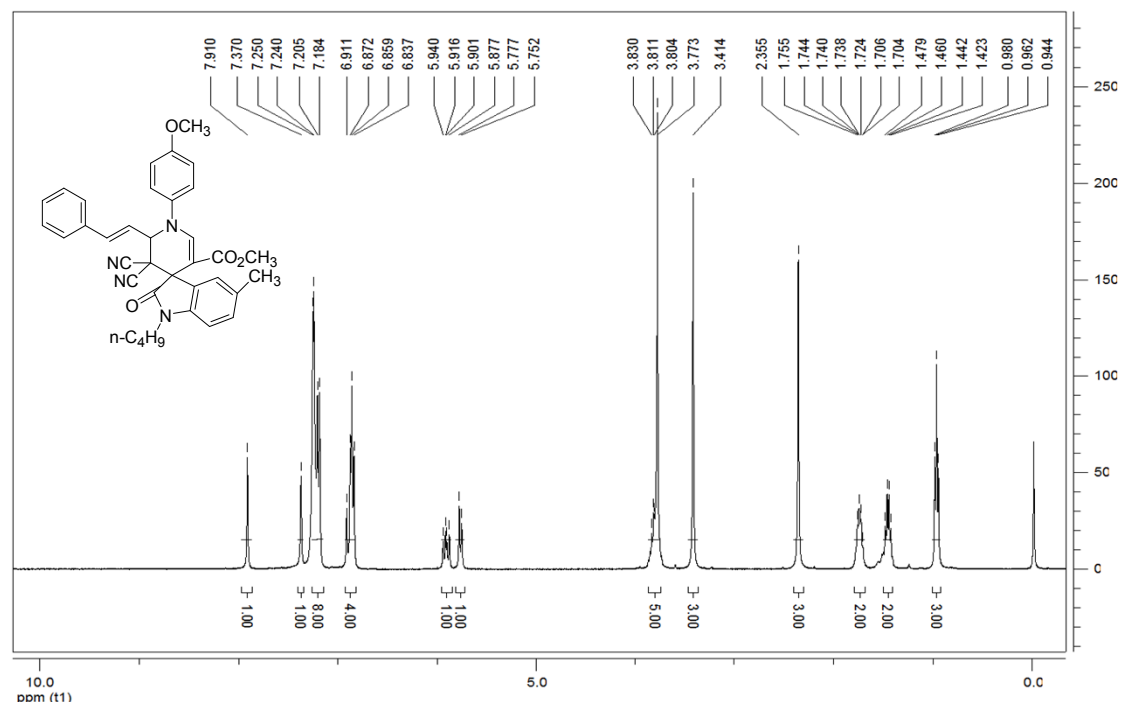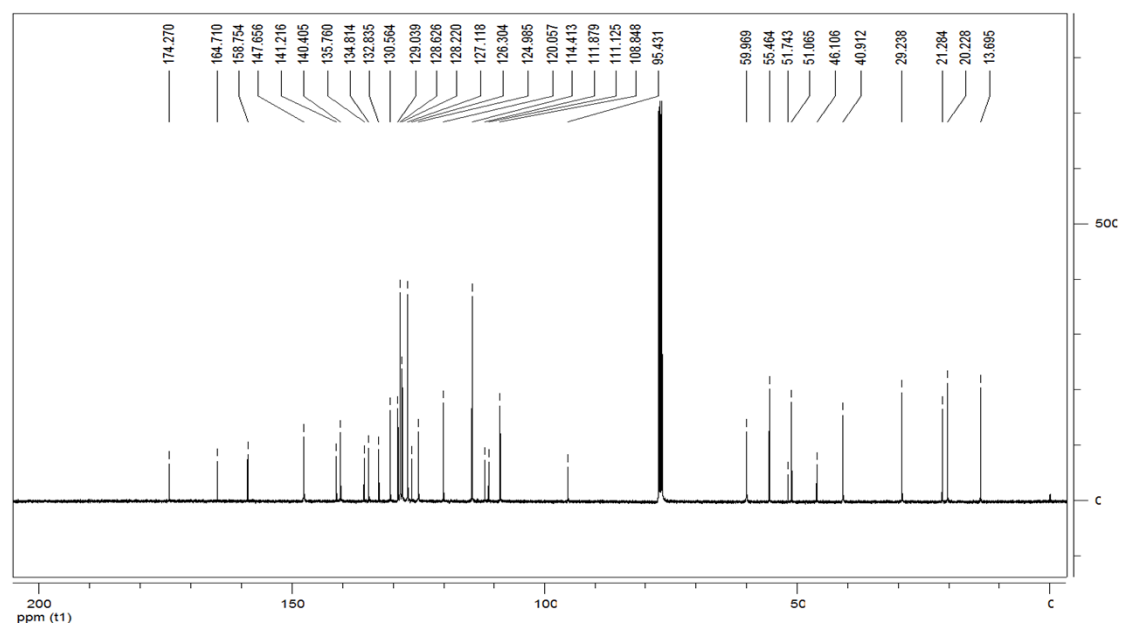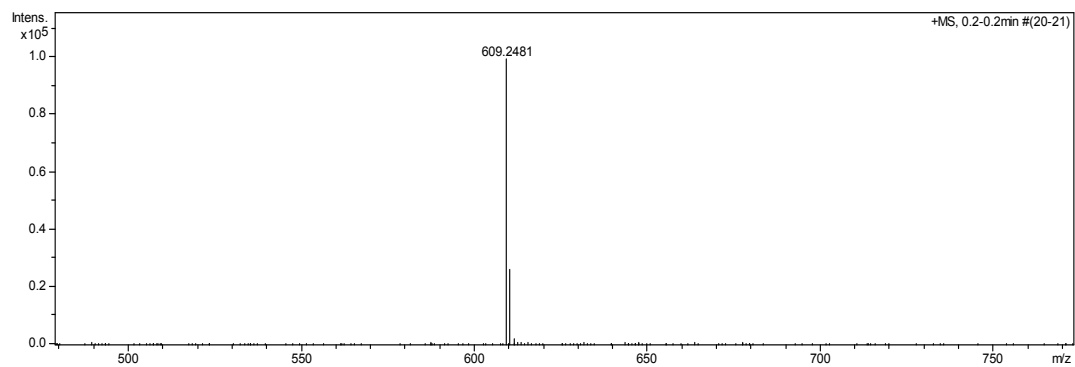

**Methyl 1-butyl-3',3'-dicyano-1'-(4-methoxyphenyl)-5-methyl-2-oxo-2'-styryl-2',3'-dihydro-**

**<sup>1</sup>H-spiro[indoline-3,4'-pyridine]-5'-carboxylate (4e):**

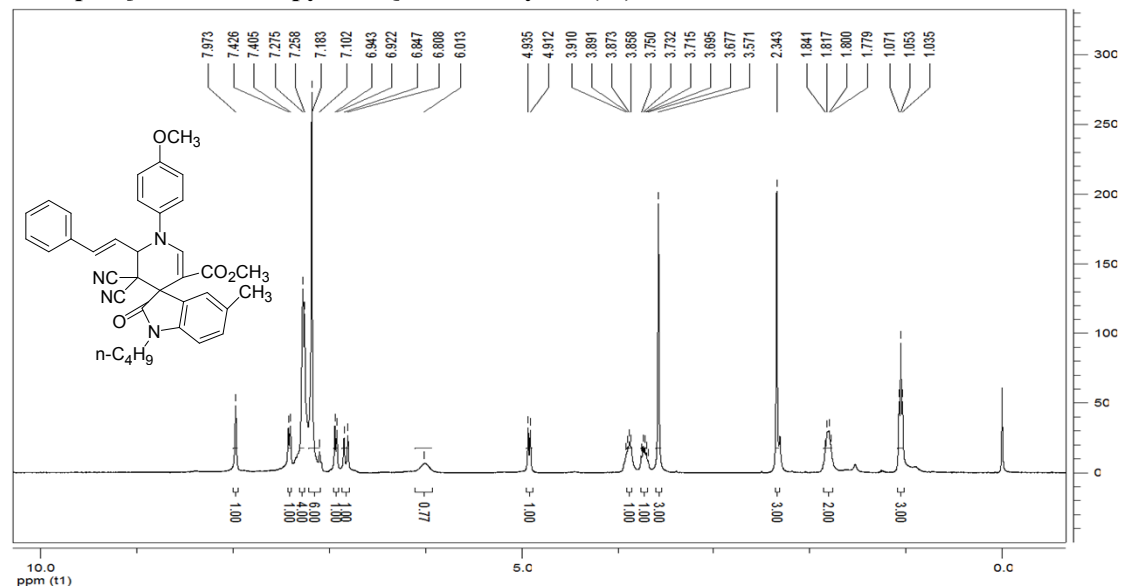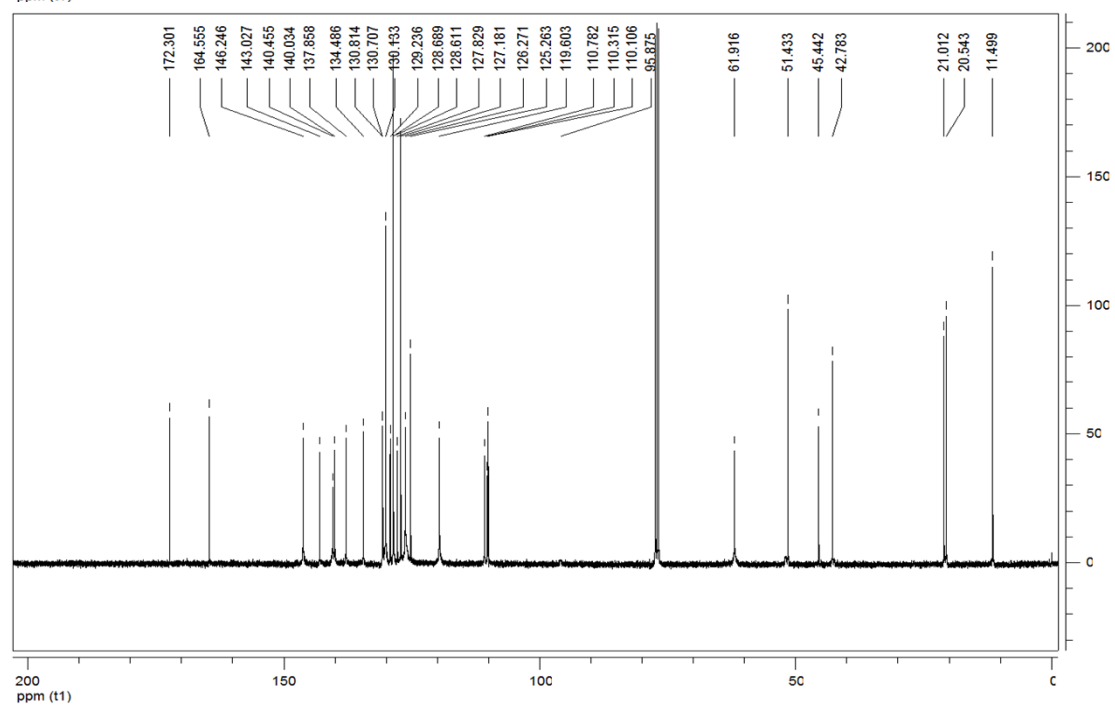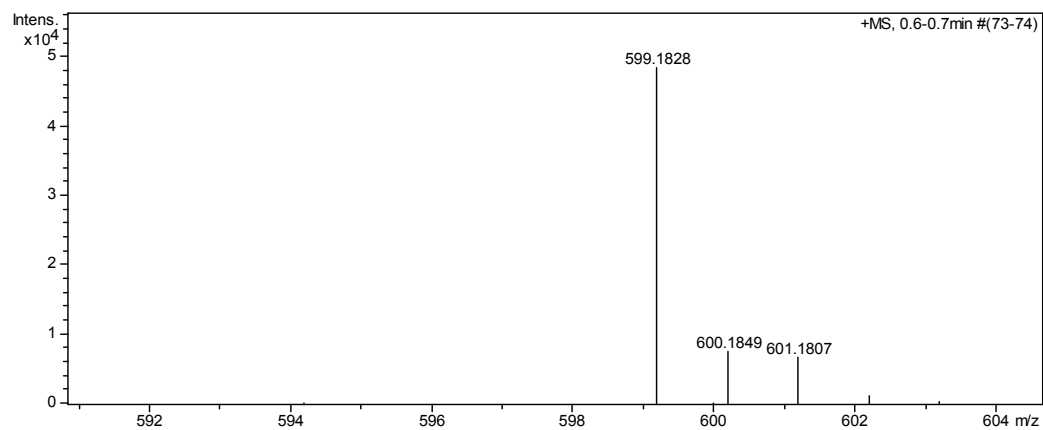

**Methyl 1-benzyl-3,3'-dicyano-5-fluoro-2-oxo-2'-styryl-1'-p-tolyl-2',3'-dihydro-1'H-**

spiro[indoline-3,4'-pyridine]-5'-carboxylate (4f):

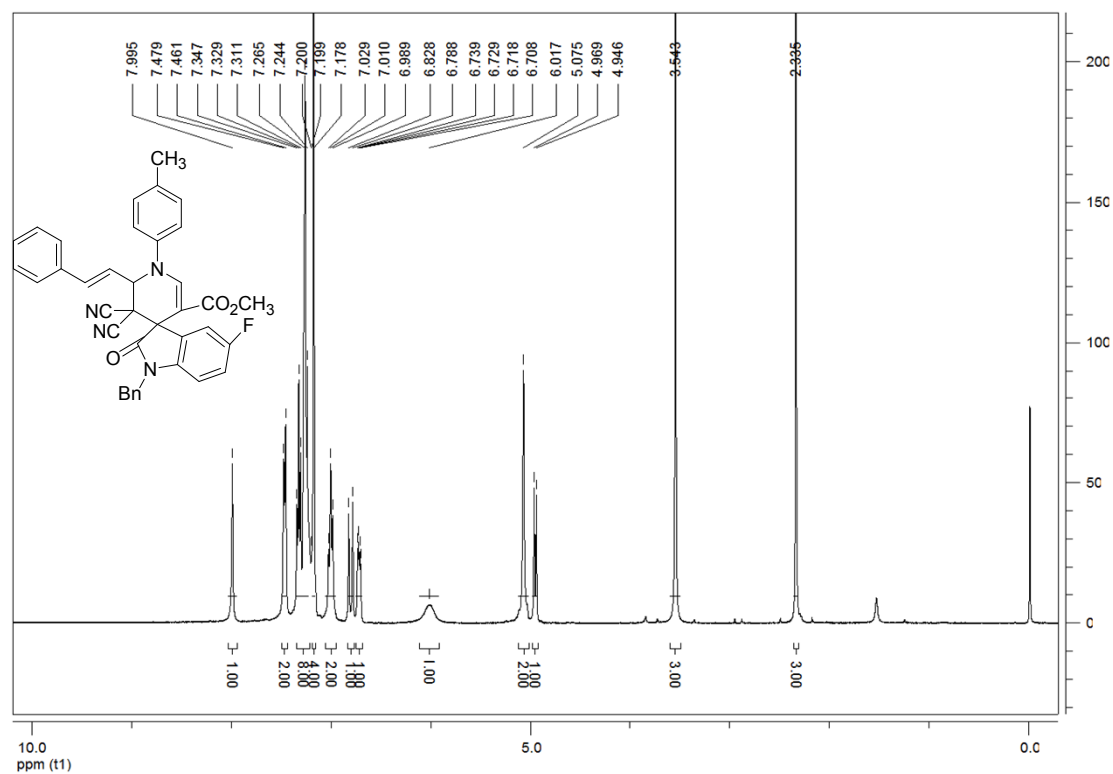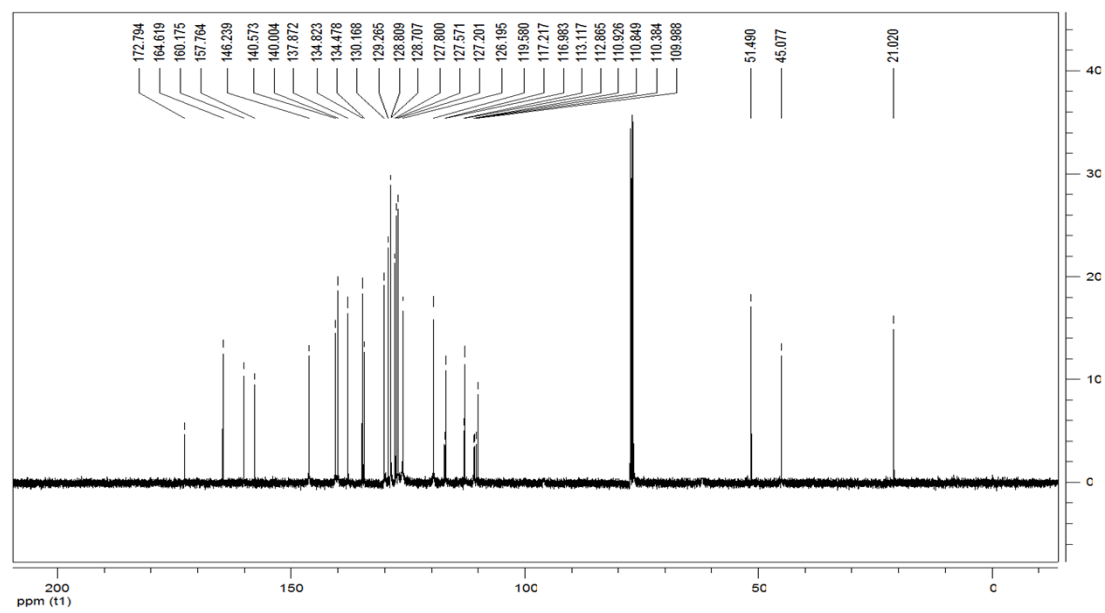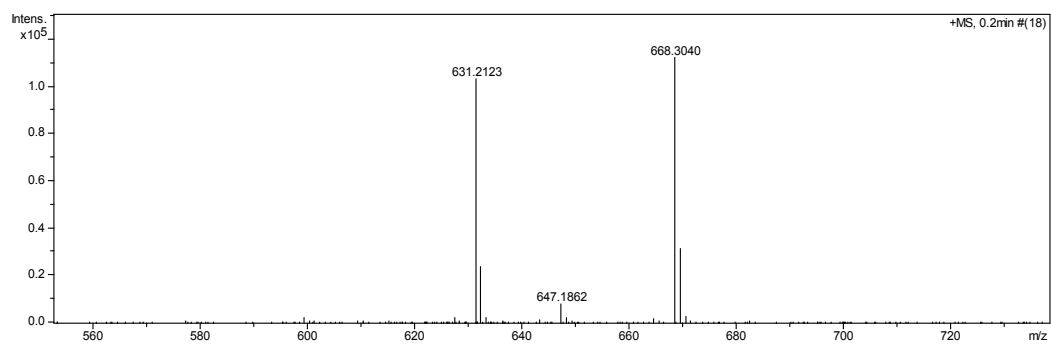

**Methyl 1-benzyl-5-chloro-3',3'-dicyano-1'-(4-methylphenyl)-2'-(3-methylstyryl)-2-oxo-2',3'-dihydro-1'H-spiro[indoline-3,4'-pyridine]-5'-carboxylate (4g):**

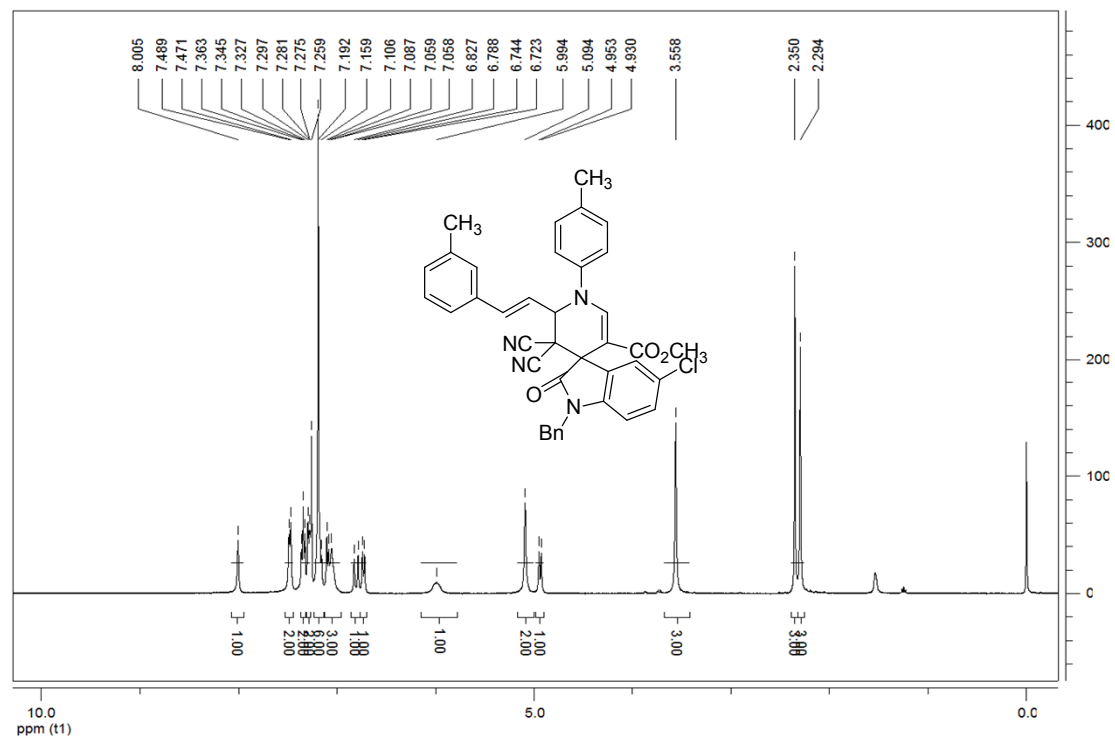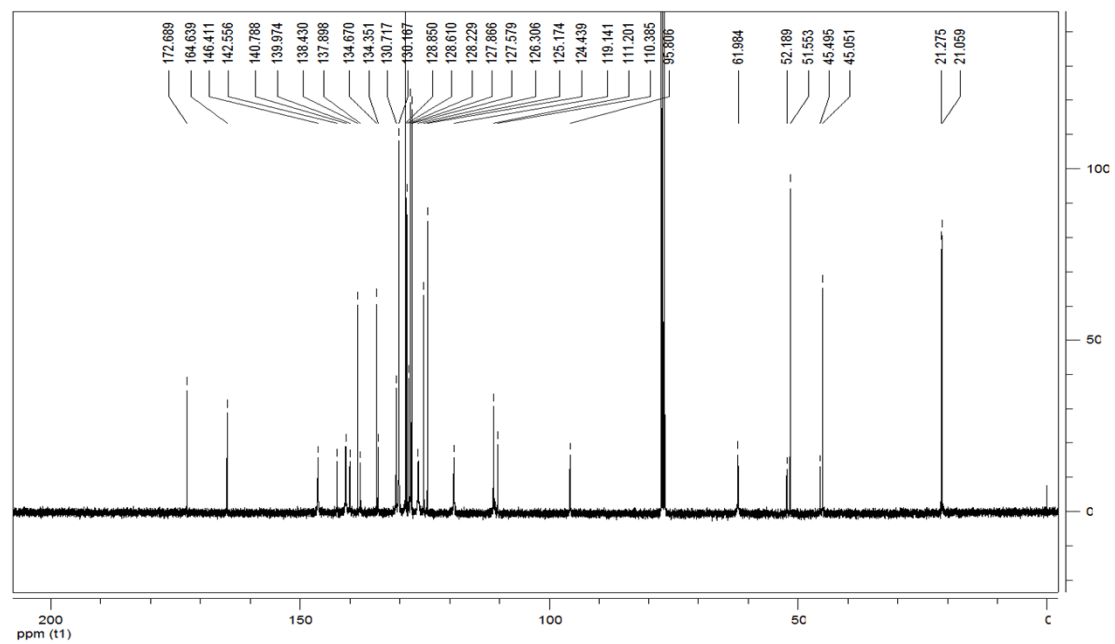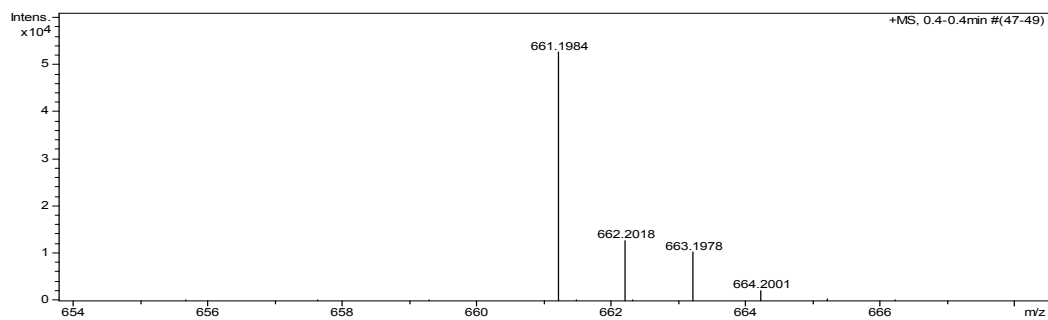

**Dimethyl 3',3'-dicyano-1,3-dioxo-1'-phenyl-2'-styryl-1,2',3,3'-tetrahydro-1'H-spiro[indene-2,4'-pyridine]-5',6'-dicarboxylate (5a):**

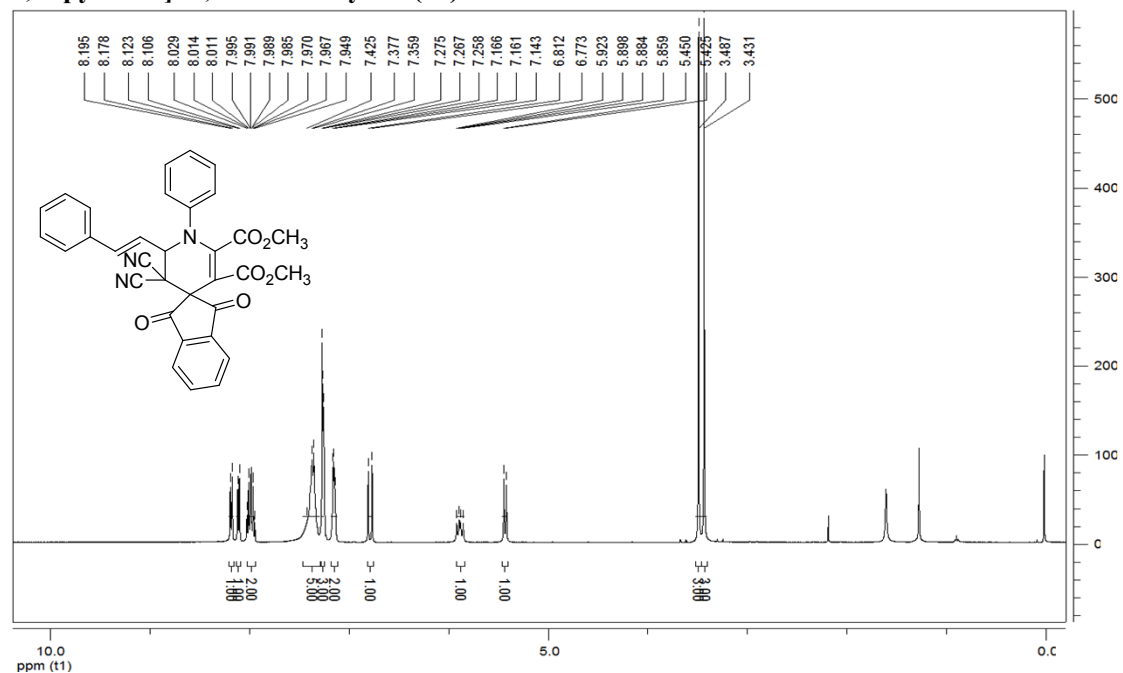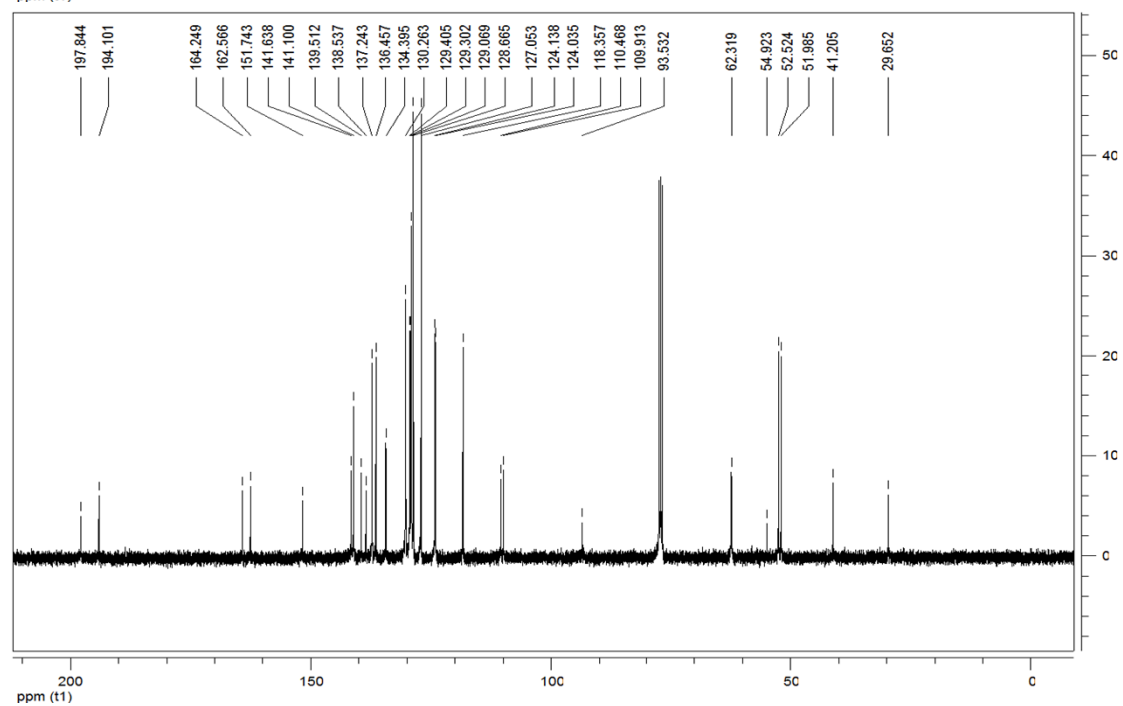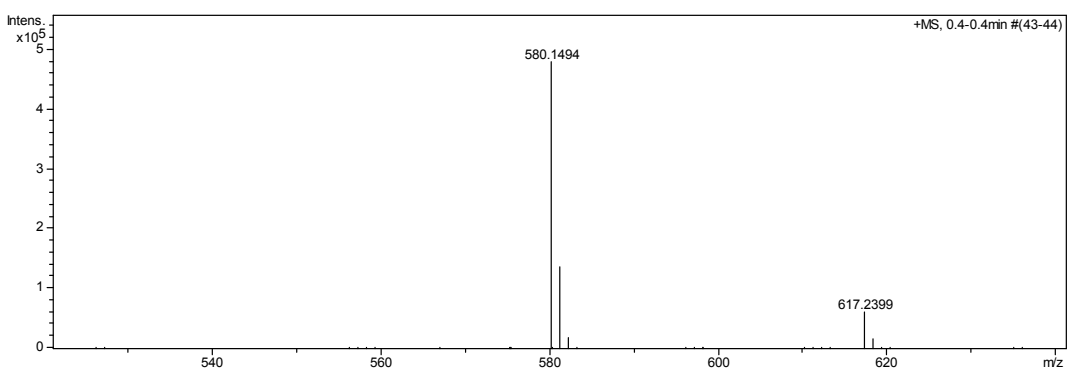

**Dimethyl 3',3'-dicyano-1,3-dioxo-2'-styryl-1'-p-tolyl-1,2',3,3'-tetrahydro-1'H-spiro[indene-2,4'-pyridine]-5',6'-dicarboxylate (5b):**

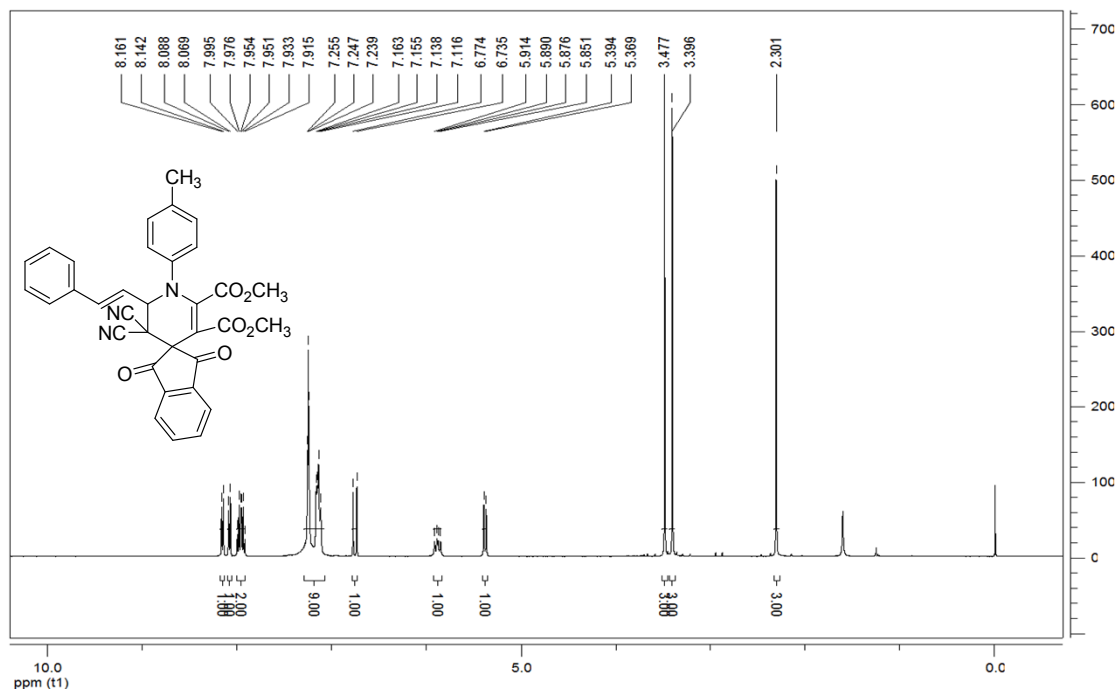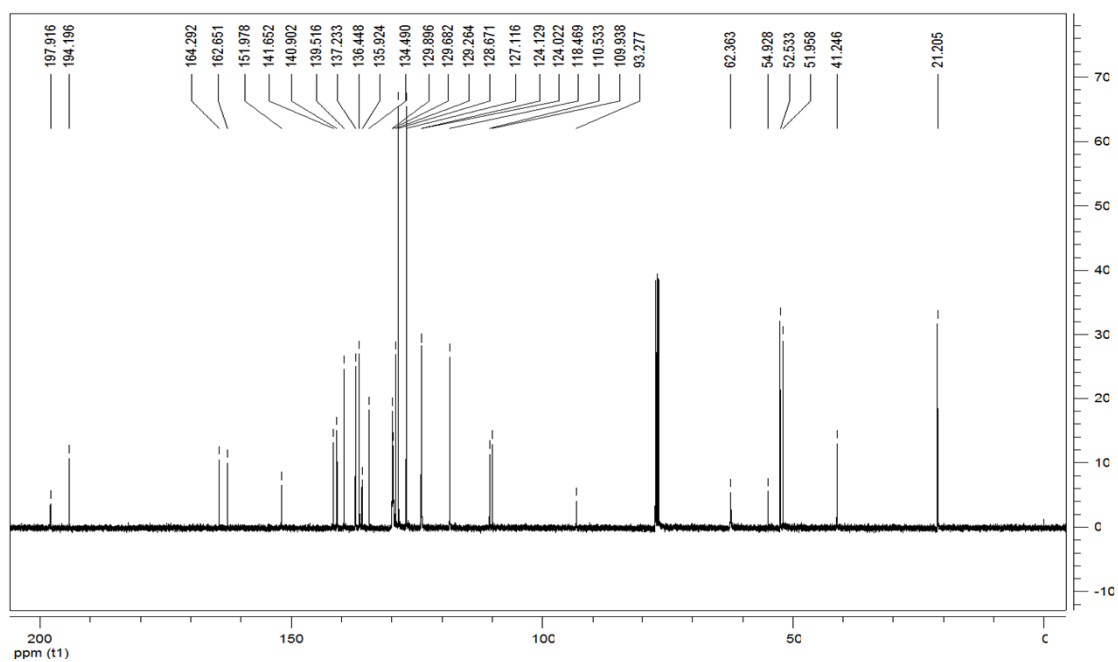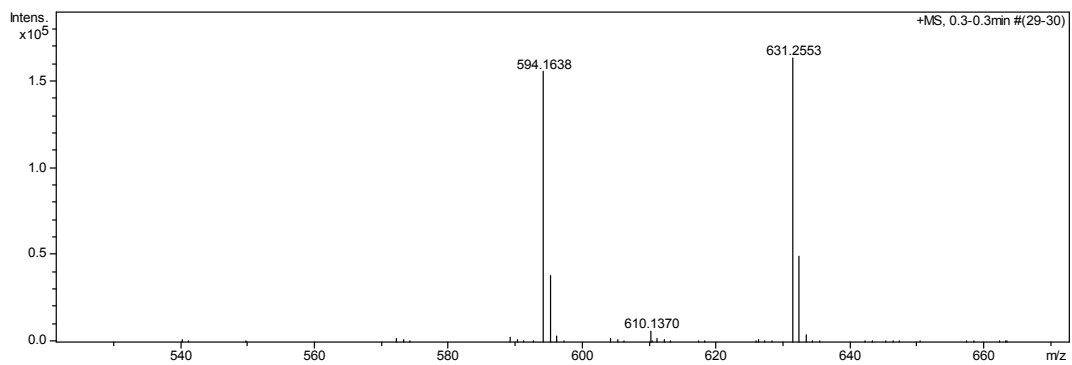

**Dimethyl 3',3'-dicyano-1'-(4-methoxyphenyl)-1,3-dioxo-2'-styryl-1,2',3,3'-tetrahydro-1'H-spiro[indene-2,4'-pyridine]-5',6'-dicarboxylate (5c):**

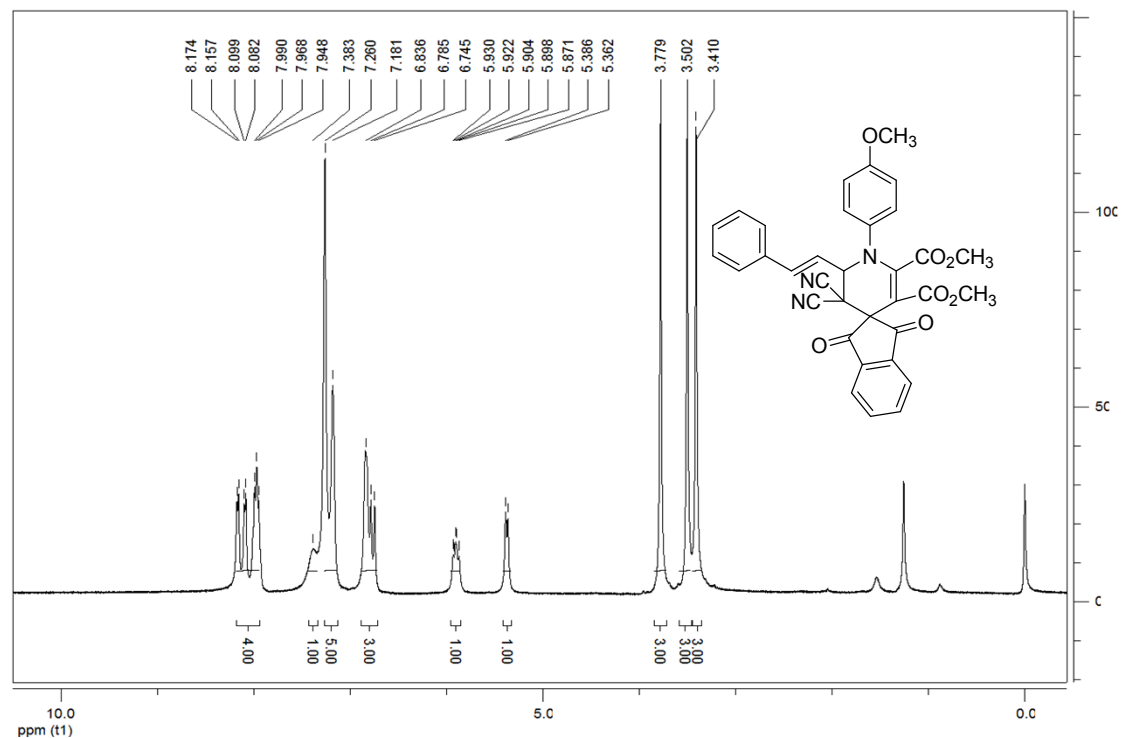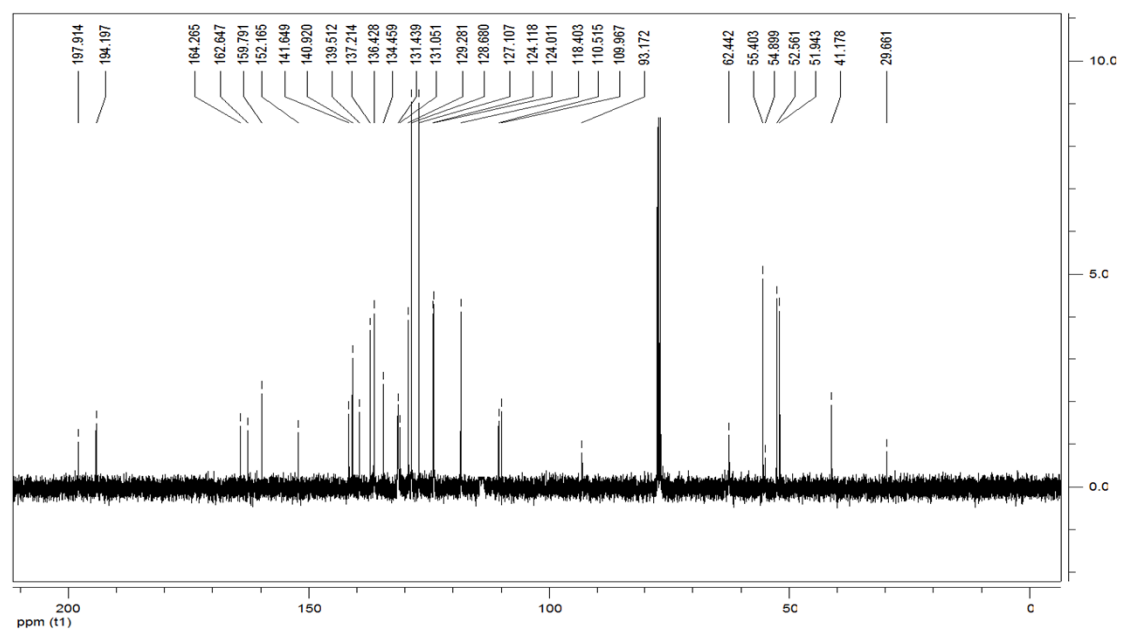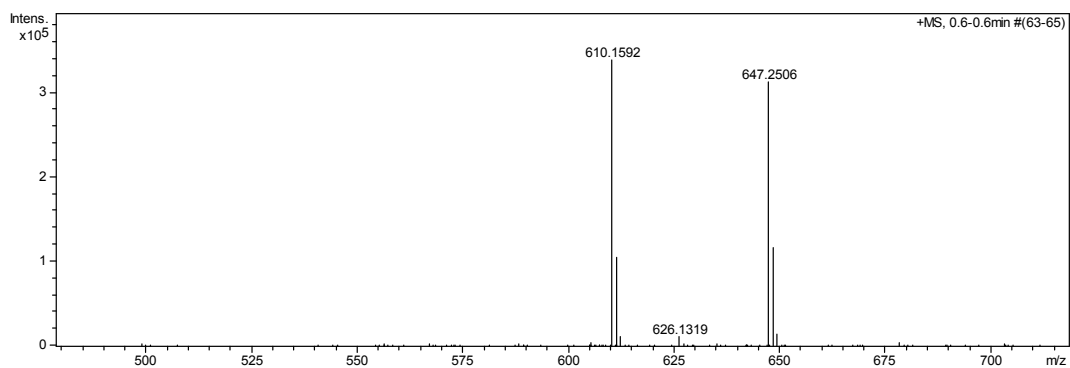



**Dimethyl 3',3'-dicyano-2'-(3-methylstyryl)-1,3-dioxo-1'-phenyl-1,2',3,3'-tetrahydro-1'H-spiro[indene-2,4'-pyridine]-5',6'-dicarboxylate (5d):**

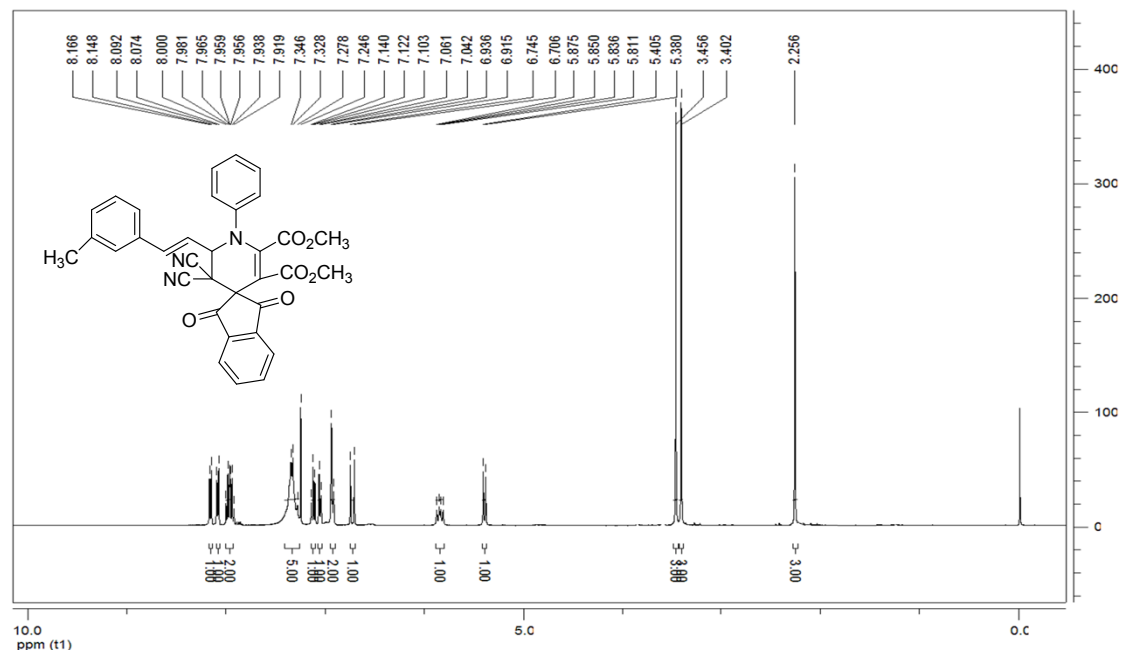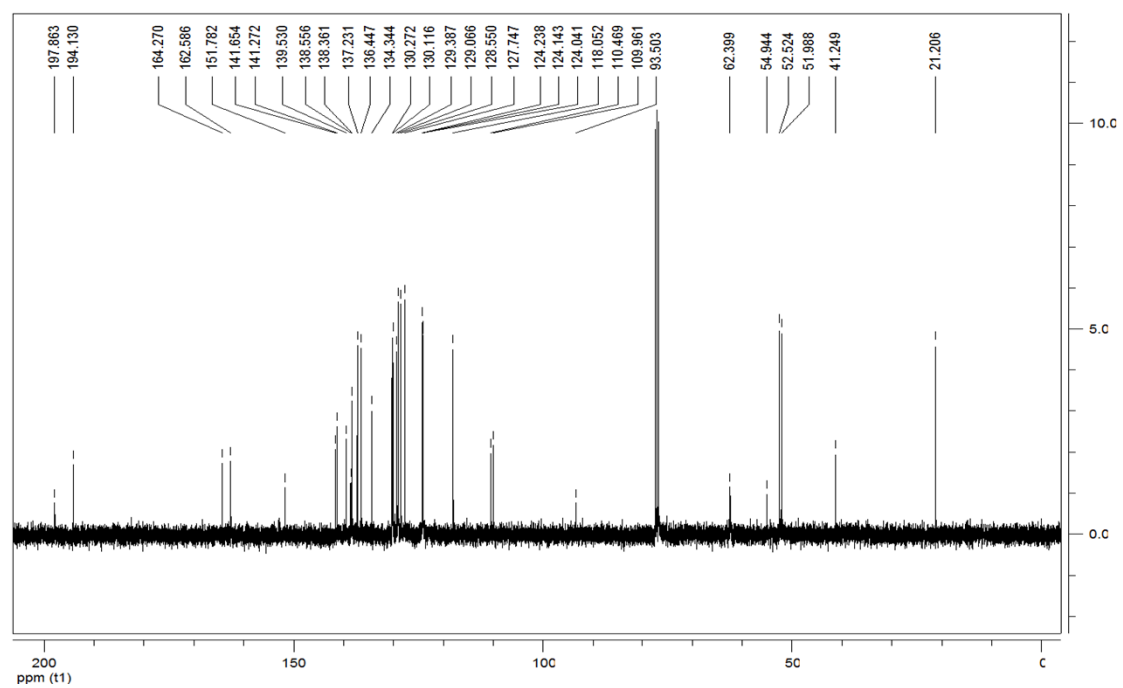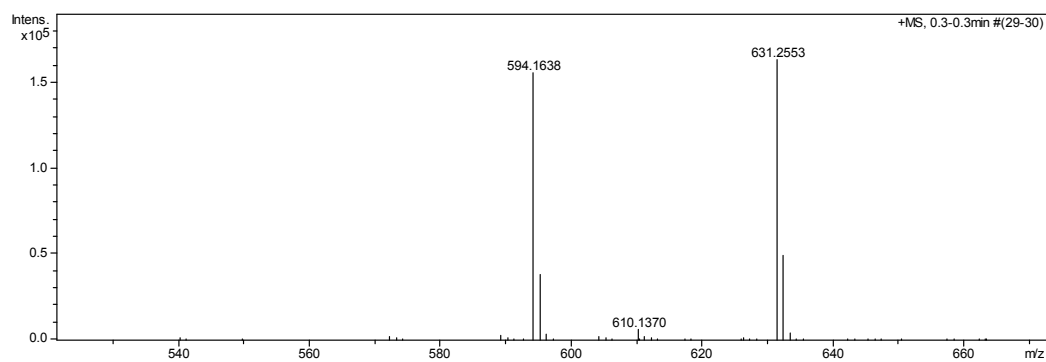

**Dimethyl 3',3'-dicyano-1'-(4-methoxyphenyl)-2'-(3-methylstyryl)-1,3-dioxo-1,2',3,3'-tetrahydro-1'H-spiro[indene-2,4'-pyridine]-5',6'-dicarboxylate (5e):**

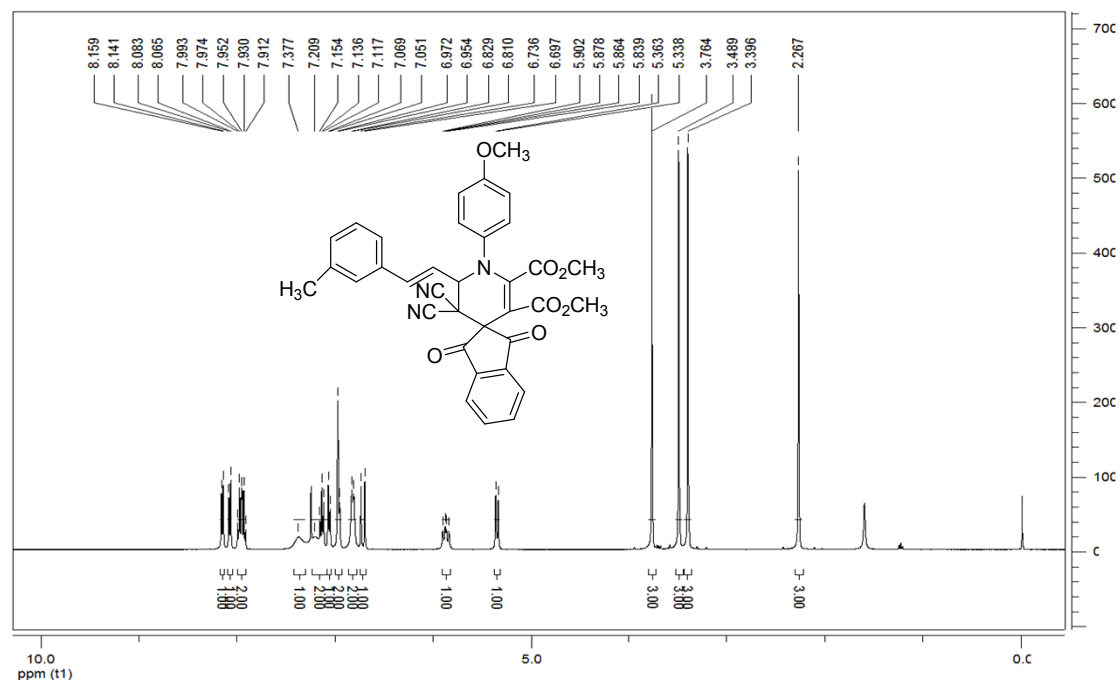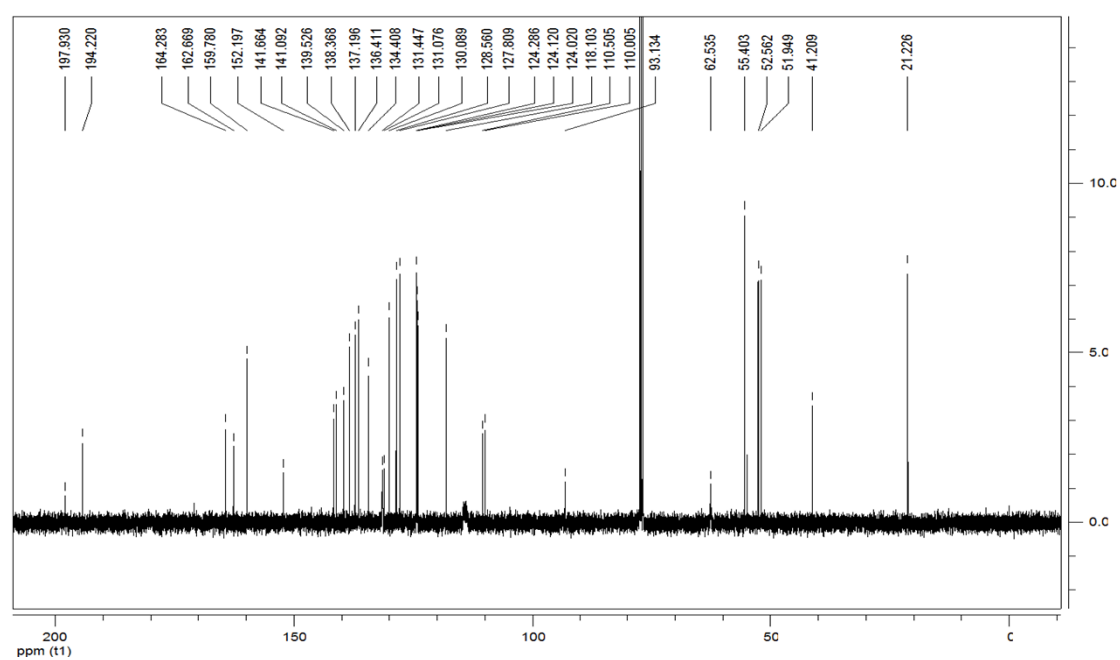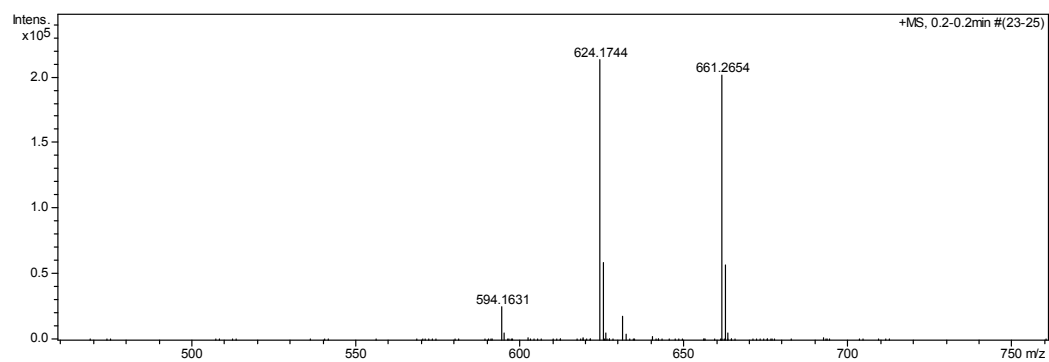

**Dimethyl 1'-(4-bromophenyl)-3',3'-dicyano-2'-(3-methylstyryl)-1,3-dioxo-1,2',3,3'-tetrahydro-1'H-spiro[indene-2,4'-pyridine]-5',6'-dicarboxylate (5f):**

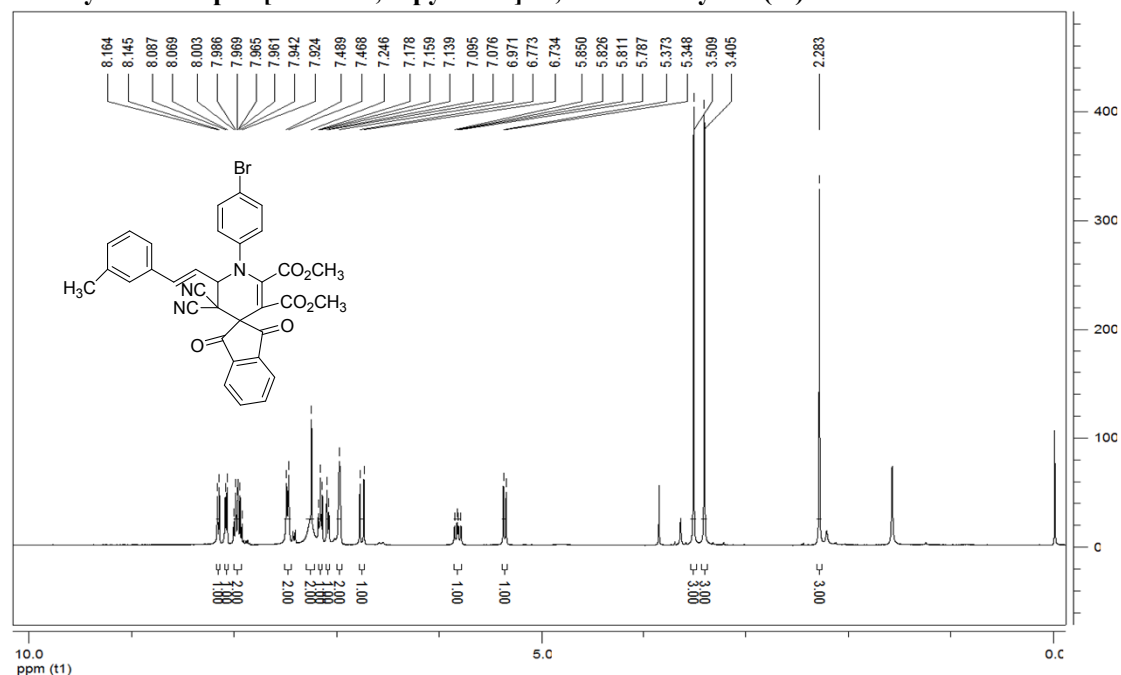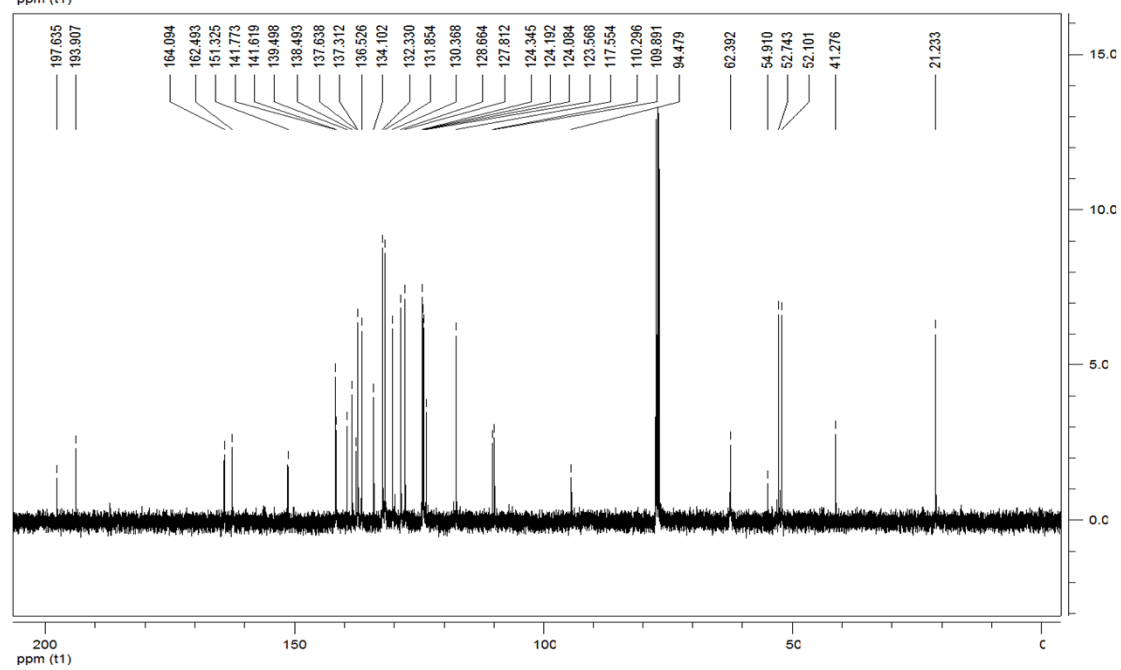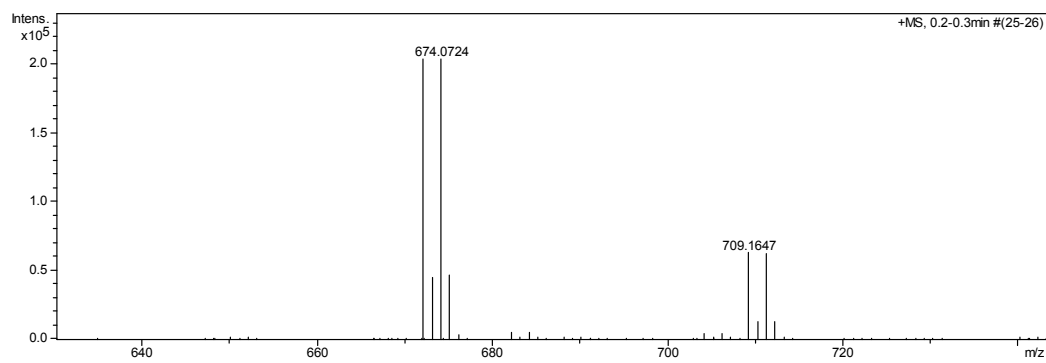

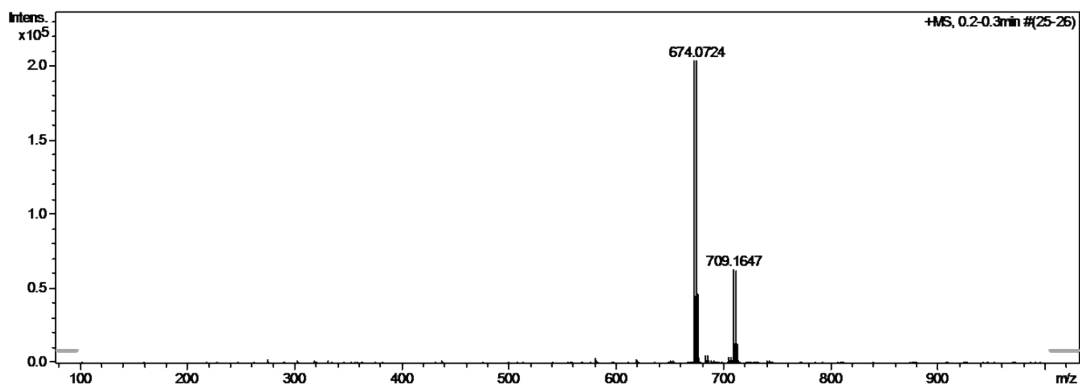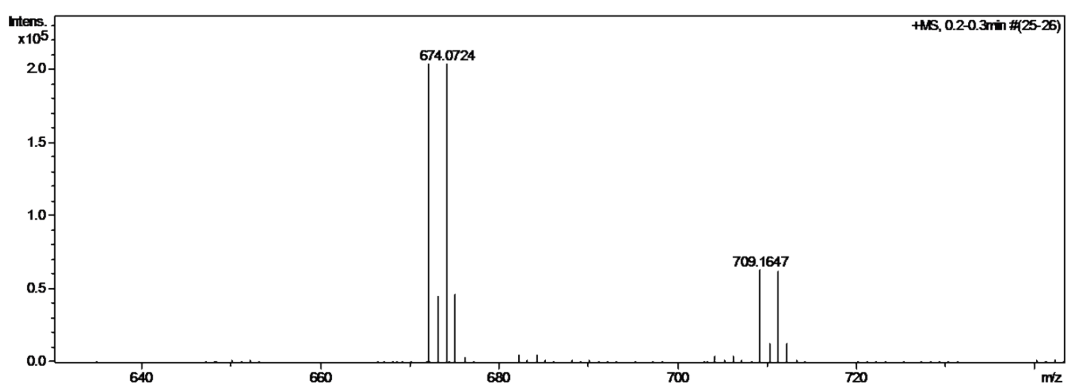

| Meas. m/z | # | Formula                                                                        | Score | m/z      | err [mDa] | err [ppm] | mSigma | rdb  | e <sup>-</sup> Conf | N-Rule |
|-----------|---|--------------------------------------------------------------------------------|-------|----------|-----------|-----------|--------|------|---------------------|--------|
| 672.0738  | 1 | C 15 H 16 Br N 21 Na O 5                                                       | 46.96 | 672.0719 | -1.9      | -2.9      | 14.3   | 17.5 | even                | ok     |
|           | 2 | C 18 H 24 Br N 11 Na O 11                                                      | 100   | 672.0732 | -0.6      | -0.9      | 18.2   | 11.5 | even                | ok     |
|           | 3 | C 17 H 28 Br N 7 Na O 15                                                       | 42.93 | 672.0719 | -1.9      | -2.9      | 19.1   | 6.5  | even                | ok     |
|           | 4 | C 21 H 32 Br N Na O 17                                                         | 79.66 | 672.0746 | 0.8       | 1.1       | 24.6   | 5.5  | even                | ok     |
|           | 5 | C 19 H 20 Br N 15 Na O 7                                                       | 75.83 | 672.0746 | 0.7       | 1.1       | 27     | 16.5 | even                | ok     |
|           | 6 | C 16 H 12 Br N 25 Na O                                                         | 81.2  | 672.0732 | -0.6      | -0.9      | 27.4   | 22.5 | even                | ok     |
|           | 7 | C <sub>34</sub> H <sub>24</sub> Br <sub>3</sub> Na <sub>6</sub> O <sub>6</sub> | 13.23 | 672.0741 | 0.2       | 0.4       | 87.3   | 23.5 | even                | ok     |
|           | 8 | C 31 H 16 Br N 13 Na                                                           | 8.13  | 672.0727 | -1.1      | -1.6      | 88.5   | 29.5 | even                | ok     |
|           | 9 | C 35 H 20 Br N 7 Na O 2                                                        | 3.57  | 672.0754 | 1.6       | 2.4       | 99.8   | 28.5 | even                | ok     |
